# Supplementary material for: VirSorter2: a multi-classifier, expert-guided approach to detect diverse DNA and RNA viruses
Source: Microbiome. 2021 Feb 1;9:37. doi: 10.1186/s40168-020-00990-y (PMC7852108; doi:10.1186/s40168-020-00990-y)
Supplement: Supplementary file 5 — Additional file 4. Manual inspection of contigs newly identified by VirSorter2 in Tara Oceans virome 85_SRF. The spreadsheet includes four tabs, including the list and characteristics of contigs ≥ 5kb selected for manual inspection (“Contigs ≥ 5kb - Manual inspection”), the DRAM-v annotation of these contigs (“Contigs ≥ 5kb - DRAM-v annotation”), the list and characteristics of contigs ≥ 5kb selected for manual inspection (“Contigs < 5kb - Manual inspection”), and their DRAM-v annotation (“Contigs < 5kb - DRAM-v annotation”). For the manual inspection tabs, column headers correspond to the standard output of VirSorter2 (“final-viral-score.tsv”), i.e. sequence name, score for each of the 5 classifiers, maximum score for this sequence, group yielding this maximum score, sequence length, number of hallmark gene(s) for the maximum score group, percentage of viral and cellular genes, along with an additional column (“Manual inspection notes”) indicating the conclusions from the expert curators. The DRAM-v annotation tabs column headers correspond to the default DRAM-v output. [file 40168_2020_990_MOESM5_ESM.xlsx]

## Sheet: Contigs ≥ 5kb - Manual inspecti
seqname	dsDNAphage	NCLDV	RNA	ssDNA	lavidaviridae	max_score	max_score_group	length	hallmark gene #	viral gene %	cellular gene %	Manual inspection notes
NODE_1921_length_18480_cov_18.842062__full	0	0.5	0	0	0.1	0.5	NCLDV	18046	0	20	13.3	Likely not viral	Likely viral	34
NODE_9041_length_5371_cov_2.636945__full	0.1	0.6	0	0	0.1	0.6	NCLDV	5348	0	20	0	Likely not viral	Unsure	19
NODE_3577_length_10993_cov_6.024959__full	0.1	0.8	0	0	0.2	0.8	NCLDV	10991	0	16.7	8.3	Likely not viral	Likely not viral	7
NODE_7819_length_6000_cov_6.018671__full	0.1	0.8	0.1	0.1	0.4	0.8	NCLDV	5998	0	25	0	Likely not viral
NODE_9862_length_5025_cov_2.579879__full	0.1	0.9	0.1	0	0.5	0.9	NCLDV	5023	0	20	0	Likely not viral
NODE_5036_length_8438_cov_34.631516__full	0.3	0.6	0.2	0	0.1	0.6	NCLDV	7849	0	12.5	0	Likely not viral
NODE_8867_length_5447_cov_61.927485__full	0.4	0.7	0.1	0.6	0.7	0.7	NCLDV	5445	0	20	0	Likely viral
NODE_7200_length_6383_cov_5.922724__full	0.4	0.7	0	0	0.1	0.7	NCLDV	5644	0	40	0	Unsure
NODE_6549_length_6891_cov_10.003072__full	0.5	0.7	0.1	0.1	0.5	0.7	NCLDV	6824	0	16.7	0	Likely viral
NODE_943_length_31852_cov_9.833915__full	0.5	1	0.3	0.2	1	1	lavidaviridae	31657	0	20.7	0	Unsure
NODE_8082_length_5824_cov_17.075923__full	0.6	0.1	0	0	0.1	0.6	dsDNAphage	7017	0	37.5	12.5	Likely viral
NODE_6184_length_7180_cov_32.779789__full	0.6	0.9	0.1	0.1	0.9	0.9	NCLDV	7176	0	43.8	6.2	Likely viral
NODE_5363_length_8047_cov_7.240616__full	0.6	0.3	0.3	0.1	0.3	0.6	dsDNAphage	8021	0	25	0	Unsure
NODE_5673_length_7713_cov_3.731523__full	0.6	0.1	0	0	0	0.6	dsDNAphage	7710	1	18.2	9.1	Unsure
NODE_9088_length_5351_cov_5.372356__full	0.6	0.2	0.6	0.4	0.8	0.8	lavidaviridae	5351	0	33.3	0	Unsure
NODE_6847_length_6646_cov_5.601881__full	0.6	0.5	0.9	0.1	0.5	0.9	RNA	6644	0	20	0	Unsure
NODE_8430_length_5664_cov_13.153325__full	0.6	0.9	0.8	0.1	0.8	0.9	NCLDV	5662	0	20	0	Unsure
NODE_3163_length_12233_cov_12.516752__full	0.6	0.8	0.9	0.4	1	1	lavidaviridae	12111	0	33.3	0	Unsure
NODE_6693_length_6766_cov_5.243928__full	0.6	0.9	0.7	0.2	1	1	lavidaviridae	6762	0	25	0	Unsure
NODE_7569_length_6147_cov_4.538083__full	0.7	0.1	0	0	0	0.7	dsDNAphage	6143	1	42.9	28.6	Likely not viral
NODE_4729_length_8836_cov_6.444596__full	0.7	0.2	0	0	0.1	0.7	dsDNAphage	8008	0	27.3	9.1	Likely viral
NODE_4230_length_9664_cov_8.102612__full	0.7	0.9	0.2	0.1	0.9	0.9	lavidaviridae	6913	0	42.9	0	Likely viral
NODE_7963_length_5904_cov_6.212857__full	0.7	0.9	0.6	0.9	1	1	lavidaviridae	5901	0	50	0	Likely viral
NODE_8905_length_5432_cov_45.512182__full	0.8	0.7	0.3	0.5	0.3	0.8	dsDNAphage	5323	0	66.7	0	Likely viral
NODE_6524_length_6902_cov_145.885643__full	0.8	0.5	0.3	0.7	0.8	0.8	dsDNAphage	6901	0	75	0	Likely viral
NODE_7914_length_5941_cov_7.943085__full	0.8	0.6	0.3	0.6	0.7	0.8	dsDNAphage	5918	0	66.7	0	Likely viral
NODE_4528_length_9154_cov_13.955819__full	0.8	1	0.3	0.6	1	1	lavidaviridae	9070	0	66.7	0	Likely viral
NODE_6476_length_6936_cov_4.395146__full	0.8	0.6	0.2	0.9	1	1	lavidaviridae	6933	0	80	0	Likely viral
NODE_7188_length_6390_cov_4.046725__full	0.8	0.8	0.7	0.8	1	1	lavidaviridae	6384	0	50	0	Likely viral
NODE_8420_length_5668_cov_19.946731__full	0.8	0.9	0.8	0.6	0.7	0.9	NCLDV	5618	0	50	0	Unsure
NODE_6225_length_7141_cov_6.287750__full	0.8	0.9	0.9	0.9	1	1	lavidaviridae	7007	0	50	0	Unsure
NODE_8848_length_5457_cov_5.236394__full	0.8	0.7	0.4	0.8	1	1	lavidaviridae	5444	0	100	0	Unsure
NODE_6445_length_6965_cov_100.921852__full	0.9	0.3	0.4	0.6	0.5	0.9	dsDNAphage	6962	0	66.7	0	Likely viral
NODE_7551_length_6156_cov_4.067366__full	0.9	0.8	0.3	0.6	0.9	0.9	dsDNAphage	6154	1	66.7	0	Likely viral
NODE_9367_length_5225_cov_17.875242__full	0.9	0.7	0.5	0.4	0.4	0.9	dsDNAphage	5186	1	50	0	Likely viral
NODE_9406_length_5211_cov_3.386928__full	0.9	0.7	0	0.1	0.4	0.9	dsDNAphage	5210	1	50	0	Likely viral
NODE_6034_length_7336_cov_6.345832__full	0.9	0.8	0.4	0.4	1	1	lavidaviridae	7335	0	66.7	0	Likely viral
NODE_4108_length_9846_cov_8.842815__full	0.9	0.5	0.3	0.5	0.4	0.9	dsDNAphage	9793	0	66.7	0	Unsure
NODE_6984_length_6550_cov_3.785835__full	0.9	0.5	0.3	0.1	0.6	0.9	dsDNAphage	6547	0	27.3	0	Unsure
NODE_7976_length_5896_cov_3.627803__full	0.9	nan	0.8	0.5	0.9	0.9	dsDNAphage	5716	1	50	0	Unsure
NODE_7996_length_5883_cov_6.886410__full	0.9	0.7	0.3	0.7	0.8	0.9	dsDNAphage	5847	0	100	0	Unsure
NODE_8067_length_5833_cov_8.425926__full	0.9	0.8	0.3	0.7	1	1	lavidaviridae	5777	0	100	0	Unsure
NODE_1343_length_23907_cov_4.420384__full	1	0.3	0.2	0.3	0.7	1	dsDNAphage	23907	2	80	0	Likely viral
NODE_2817_length_13471_cov_3.902579__full	1	0.5	0.4	0.5	0.9	1	dsDNAphage	13467	1	61.5	0	Likely viral
NODE_2881_length_13244_cov_4.774964__full	1	0.5	0.4	0.6	0.9	1	dsDNAphage	13243	1	20	0	Likely viral
NODE_3984_length_10107_cov_6.132411__full	1	0.8	0.8	0.6	1	1	dsDNAphage	10107	1	42.9	0	Likely viral
NODE_4877_length_8655_cov_4.295116__full	1	0.9	0.3	0.7	1	1	dsDNAphage	8654	1	75	0	Likely viral
NODE_5051_length_8425_cov_12.414695__full	1	0.9	0.2	0.2	0.3	1	dsDNAphage	8425	1	42.9	0	Likely viral
NODE_5367_length_8041_cov_4.784748__full	1	0.6	0.6	0.2	0.5	1	dsDNAphage	7835	0	28.6	0	Likely viral
NODE_5394_length_7999_cov_7.943353__full	1	0.8	0.5	0.4	0.4	1	dsDNAphage	7983	1	50	0	Likely viral
NODE_5542_length_7840_cov_4.417855__full	1	0.3	0.3	0.6	0.6	1	dsDNAphage	7838	2	41.7	0	Likely viral
NODE_5628_length_7756_cov_5.949357__full	1	0.8	0.2	0.9	0.7	1	dsDNAphage	7753	2	100	0	Likely viral
NODE_7057_length_6487_cov_5.298974__full	1	0.9	0.8	0.7	1	1	lavidaviridae	6483	0	40	0	Likely viral
NODE_8342_length_5698_cov_78.568669__full	1	1	0.2	0.6	0.6	1	NCLDV	5696	0	66.7	0	Likely viral
NODE_9379_length_5221_cov_11.201123__full	1	0.4	0	0.7	0.1	1	dsDNAphage	5182	0	21.4	0	Likely viral
NODE_6025_length_7347_cov_5.793884__full	1	1	0.2	0.8	1	1	lavidaviridae	7284	0	71.4	0	Unsure
NODE_5748_length_7640_cov_7.580488__lt2gene	nan	nan	nan	nan	nan	nan	dsDNAphage	7640	1	100	0	Likely viral
NODE_8083_length_5824_cov_8.918183__lt2gene	nan	nan	nan	nan	nan	nan	dsDNAphage	5824	1	100	0	Likely viral
NODE_8734_length_5515_cov_7.022711__lt2gene	nan	nan	nan	nan	nan	nan	dsDNAphage	5515	1	100	0	Likely viral
NODE_6865_length_6637_cov_4.718019__lt2gene	nan	nan	nan	nan	nan	nan	dsDNAphage	6637	1	100	0	Unsure

## Sheet: Contigs ≥ 5kb - DRAM-v annotati
scaffold	gene_position	start_position	end_position	strandedness	rank	kegg_id	kegg_hit	kegg_RBH	kegg_identity	kegg_bitScore	kegg_eVal	viral_id	viral_hit	viral_RBH	viral_identity	viral_bitScore	viral_eVal	pfam_hits	cazy_hits	vogdb_description	vogdb_categories	heme_regulatory_motif_count	peptidase_id	peptidase_family	peptidase_hit	peptidase_RBH	peptidase_identity	peptidase_bitScore	peptidase_eVal	vogdb_hits	virsorter_category	auxiliary_score	is_transposon	amg_flags
NODE_1343_length_23907_cov_4.420384__full-cat_1	1	1	1998	-1	D													Concanavalin A-like lectin/glucanases superfamily [PF13385.6]				0									1	5	FALSE	MKF
NODE_1343_length_23907_cov_4.420384__full-cat_1	2	1995	3920	-1	E																	0									1	2	FALSE	F
NODE_1343_length_23907_cov_4.420384__full-cat_1	3	3920	5713	-1	C		hoh:Hoch_0856 hypothetical protein	FALSE	0.361	75	4.17e-11	YP_009150851.1	YP_009150851.1 hypothetical protein [Escherichia phage PBECO4]	FALSE	0.172	66	3.45e-10	Baseplate J-like protein [PF04865.14]				0									0	2	FALSE	F
NODE_1343_length_23907_cov_4.420384__full-cat_1	4	5724	6116	-1	D							YP_007672929.1	YP_007672929.1 baseplate wedge subunit [Synechococcus phage S-CAM1]	FALSE	0.357	64	1.46e-11	Gene 25-like lysozyme [PF04965.14]		sp|P09425|BP25_BPT4 Baseplate wedge protein gp25; XhXs	Xh;Xs	0									0	2	FALSE	V
NODE_1343_length_23907_cov_4.420384__full-cat_1	5	6255	12497	-1	E																	0									1	2	FALSE
NODE_1343_length_23907_cov_4.420384__full-cat_1	6	12506	13468	-1	E																	0									1	2	FALSE
NODE_1343_length_23907_cov_4.420384__full-cat_1	7	13471	14778	-1	E																	0									2	2	FALSE
NODE_1343_length_23907_cov_4.420384__full-cat_1	8	14771	15073	-1	E																	0									1	2	FALSE
NODE_1343_length_23907_cov_4.420384__full-cat_1	9	15095	15754	-1	E																	0									1	2	FALSE
NODE_1343_length_23907_cov_4.420384__full-cat_1	10	15717	16118	-1	E																	0									1	2	FALSE
NODE_1343_length_23907_cov_4.420384__full-cat_1	11	16111	16365	-1	D													Zinc ribbon domain [PF09723.10]				0									2	2	FALSE
NODE_1343_length_23907_cov_4.420384__full-cat_1	12	16365	16574	-1	E																	0									1	2	FALSE
NODE_1343_length_23907_cov_4.420384__full-cat_1	13	16614	17846	-1	C		smw:SMWW4_v1c15880 hypothetical protein	FALSE	0.211	70	5.54e-10							Glycosyl transferases group 1 [PF00534.20]		sp|Q8QL34|Y335_SIRV1 Uncharacterized glycosyltransferase 335; Xh	Xh	0									1	2	FALSE	MK
NODE_1343_length_23907_cov_4.420384__full-cat_1	14	17843	19159	-1	C		fsc:FSU_1997 glgA; starch synthase	FALSE	0.211	67	4.64e-09	NP_835600.1	NP_835600.1 putative glycosyltransferases [Rhodothermus phage RM378]	FALSE	0.269	130	1.3e-30	Glycosyl transferases group 1 [PF00534.20]; Glycosyl transferases group 1 [PF13692.6]	GT4 sucrose synthase (EC 2.4.1.13); sucrose-phosphate synthase (EC 2.4.1.14); alpha-glucosyltransferase (EC 2.4.1.52); lipopolysaccharide N-acetylglucosaminyltransferase (EC 2.4.1.56); phosphatidylinositol alpha-mannosyltransferase (EC 2.4.1.57); GDP-Man: Man1GlcNAc2-PP-dolichol alpha-1,3-mannosyltransferase (EC 2.4.1.132); GDP-Man: Man3GlcNAc2-PP-dolichol/Man4GlcNAc2-PP-dolichol alpha-1,2-mannos…	REFSEQ hypothetical protein; Xu	Xu	0									1	2	FALSE	MKF
NODE_1343_length_23907_cov_4.420384__full-cat_1	15	19188	19946	-1	C		rsd:TGRD_565 hypothetical protein	FALSE	0.213	61	7.12e-08							PD-(D/E)XK nuclease superfamily [PF12705.7]		sp|O64262|VG69_BPMD2 Gene 69 protein; Xu	Xu	0									1	2	FALSE	F
NODE_1343_length_23907_cov_4.420384__full-cat_1	16	19946	20578	-1	E																	0									1	2	FALSE	F
NODE_1343_length_23907_cov_4.420384__full-cat_1	17	20672	21106	-1	C		sur:STAUR_1421 hypothetical protein	FALSE	0.359	92	1.52e-19							Fatty acid hydroxylase superfamily [PF04116.13]				0									1	2	FALSE	F
NODE_1343_length_23907_cov_4.420384__full-cat_1	18	21167	22480	-1	A	K07175	aar:Acear_0868 PhoH family protein; K07175 PhoH-like ATPase	TRUE	0.497	402	2.45e-121	YP_009664467.1	YP_009664467.1 hypothetical protein PBI_PBS1_266 [Bacillus virus PBS1]	FALSE	0.319	218	4.94e-60	PhoH-like protein [PF02562.16]; PIN domain [PF13638.6]		sp|P46343|PHOL_BACSU PhoH-like protein; Xh	Xh	0									1	4	FALSE	MKF
NODE_1343_length_23907_cov_4.420384__full-cat_1	19	22484	23047	-1	E																	0									2	4	FALSE	F
NODE_1343_length_23907_cov_4.420384__full-cat_1	20	23044	23907	-1	E																	0									2	5	FALSE	F
NODE_1921_length_18480_cov_18.842062__full-cat_2	1	1	219	-1	E																	0										5	FALSE	F
NODE_1921_length_18480_cov_18.842062__full-cat_2	2	239	364	-1	E																	0										4	FALSE	F
NODE_1921_length_18480_cov_18.842062__full-cat_2	3	379	873	-1	C		fli:Fleli_2247 hypothetical protein	FALSE	0.445	98	3.98e-21											0										4	FALSE	F
NODE_1921_length_18480_cov_18.842062__full-cat_2	4	1139	3283	-1	A		asl:Aeqsu_2327 hypothetical protein	TRUE	0.448	570	1.4e-174							Helix-turn-helix domain [PF12833.7]; FlgO protein [PF17680.1]; Bacterial regulatory helix-turn-helix proteins, AraC family [PF00165.23]				0									1	4	FALSE	F
NODE_1921_length_18480_cov_18.842062__full-cat_2	5	3507	4331	-1	C		mrs:Murru_1734 TonB family protein	FALSE	0.305	111	2.43e-24											0										3	FALSE	F
NODE_1921_length_18480_cov_18.842062__full-cat_2	6	4341	5165	-1	A	K00560	zga:zobellia_870 thyA; thymidylate synthase (EC:2.1.1.45); K00560 thymidylate synthase [EC:2.1.1.45]	TRUE	0.946	546	1.44e-174	YP_007010969.1	YP_007010969.1 thymidylate synthase [Deep-sea thermophilic phage D6E]	TRUE	0.652	355	1.1e-109	Thymidylate synthase [PF00303.19]		sp|P00471|TYSY_BPT4 Thymidylate synthase; Xr	Xr	0										3	FALSE	VMF
NODE_1921_length_18480_cov_18.842062__full-cat_2	7	5429	6985	-1	A		asl:Aeqsu_1664 hypothetical protein	TRUE	0.434	403	2.18e-120	YP_007354266.1	YP_007354266.1 hypothetical protein Moumou_00290 [Acanthamoeba polyphaga moumouvirus]	FALSE	0.175	62	5.82e-09	Arylsulfotransferase (ASST) [PF05935.11]				0									1	4	FALSE	MK
NODE_1921_length_18480_cov_18.842062__full-cat_2	8	7018	8694	-1	A	K03317	lan:Lacal_1481 Na+ dependent nucleoside transporter domain-containing protein; K03317 concentrative nucleoside transporter, CNT family	TRUE	0.666	765	9.67e-245							Na+ dependent nucleoside transporter C-terminus [PF07662.13]; Na+ dependent nucleoside transporter N-terminus [PF01773.20]				0									2	4	FALSE
NODE_1921_length_18480_cov_18.842062__full-cat_2	9	8711	9325	-1	C	K08999	lan:Lacal_1480 hypothetical protein; K08999 hypothetical protein	FALSE	0.79	336	3.83e-103							Bifunctional nuclease [PF02577.14]				0										4	FALSE
NODE_1921_length_18480_cov_18.842062__full-cat_2	10	9477	10439	-1	A	K03522	lan:Lacal_1479 electron transfer flavoprotein subunit alpha; K03522 electron transfer flavoprotein alpha subunit	TRUE	0.769	503	1.87e-158							Electron transfer flavoprotein FAD-binding domain [PF00766.19]; Electron transfer flavoprotein domain [PF01012.21]				0										4	FALSE
NODE_1921_length_18480_cov_18.842062__full-cat_2	11	10586	11332	-1	A	K03521	lan:Lacal_1478 electron transfer flavoprotein subunit alpha/beta; K03521 electron transfer flavoprotein beta subunit	TRUE	0.83	426	2.43e-133							Electron transfer flavoprotein domain [PF01012.21]				0										4	FALSE
NODE_1921_length_18480_cov_18.842062__full-cat_2	12	11684	12661	1	A	K00162	lan:Lacal_1477 pyruvate dehydrogenase (EC:1.2.4.1); K00162 pyruvate dehydrogenase E1 component subunit beta [EC:1.2.4.1]	TRUE	0.909	619	1.02e-198	YP_009213702.1	YP_009213702.1 putative transketolase central region-containing protein [Prochlorococcus phage P-TIM68]	FALSE	0.364	91	1.19e-18	Transketolase, pyrimidine binding domain [PF02779.24]; Transketolase, C-terminal domain [PF02780.20]; Pyruvate:ferredoxin oxidoreductase core domain II [PF17147.4]		REFSEQ putative transketolase central region-containing protein; Xu	Xu	0										4	FALSE	MK
NODE_1921_length_18480_cov_18.842062__full-cat_2	13	12722	15262	1	A		lan:Lacal_1476 hypothetical protein	TRUE	0.72	1215	0							CarboxypepD_reg-like domain [PF13715.6]				0									2	4	FALSE	F
NODE_1921_length_18480_cov_18.842062__full-cat_2	14	15387	15914	1	C	K01507	zga:zobellia_863 ppa; inorganic pyrophosphatase (EC:3.6.1.1); K01507 inorganic pyrophosphatase [EC:3.6.1.1]	FALSE	0.933	344	1.78e-106							Inorganic pyrophosphatase [PF00719.19]				0										4	FALSE	MKF
NODE_1921_length_18480_cov_18.842062__full-cat_2	15	16049	18046	1	A	K15987	cat:CA2559_05940 Inorganic H+ pyrophosphatase; K15987 K(+)-stimulated pyrophosphate-energized sodium pump [EC:3.6.1.1]	TRUE	0.794	1082	0							Inorganic H+ pyrophosphatase [PF03030.16]				0									2	5	FALSE	F
NODE_2817_length_13471_cov_3.902579__full-cat_1	1	1	5307	-1	C		pput:L483_15535 hypothetical protein	FALSE	0.297	91	1.83e-15											0									0	5	FALSE	F
NODE_2817_length_13471_cov_3.902579__full-cat_1	2	5304	6038	-1	E																	0									2	2	FALSE
NODE_2817_length_13471_cov_3.902579__full-cat_1	3	6070	6933	-1	E																	0									2	2	FALSE
NODE_2817_length_13471_cov_3.902579__full-cat_1	4	6935	7306	-1	E																	0									1	2	FALSE
NODE_2817_length_13471_cov_3.902579__full-cat_1	5	7333	8910	-1	E																	0									1	2	FALSE	F
NODE_2817_length_13471_cov_3.902579__full-cat_1	6	8910	9566	-1	E																	0									2	2	FALSE	F
NODE_2817_length_13471_cov_3.902579__full-cat_1	7	9563	12091	-1	D													Pectate lyase superfamily protein [PF12708.7]				0									2	2	FALSE	F
NODE_2817_length_13471_cov_3.902579__full-cat_1	8	12104	12292	-1	E																	0									1	2	FALSE	F
NODE_2817_length_13471_cov_3.902579__full-cat_1	9	12294	12467	-1	E																	0									1	2	FALSE	F
NODE_2817_length_13471_cov_3.902579__full-cat_1	10	12464	12598	-1	E																	0									2	2	FALSE	F
NODE_2817_length_13471_cov_3.902579__full-cat_1	11	12595	12999	-1	E																	0									1	2	FALSE	F
NODE_2817_length_13471_cov_3.902579__full-cat_1	12	12996	13244	-1	E																	0									1	2	FALSE	F
NODE_2817_length_13471_cov_3.902579__full-cat_1	13	13351	13467	-1	E																	0									1	5	FALSE	F
NODE_2881_length_13244_cov_4.774964__full-cat_1	1	1	465	1	C		tni:TVNIR_2162 glycosyl transferase group 1	FALSE	0.392	76	1.15e-13							Glycosyl transferases group 1 [PF00534.20]				0									2	5	FALSE	MKF
NODE_2881_length_13244_cov_4.774964__full-cat_1	2	447	1283	1	E																	0									2	4	FALSE	F
NODE_2881_length_13244_cov_4.774964__full-cat_1	3	1291	2037	1	C		bid:Bind_3213 hypothetical protein	FALSE	0.331	128	2.62e-30	YP_004062041.1	YP_004062041.1 hypothetical protein MpV1_158 [Micromonas sp. RCC1109 virus MpV1]	FALSE	0.347	135	3.18e-34			REFSEQ hypothetical protein; Xu	Xu	0									1	4	FALSE	F
NODE_2881_length_13244_cov_4.774964__full-cat_1	4	1976	2647	1	E																	0									2	2	FALSE	F
NODE_2881_length_13244_cov_4.774964__full-cat_1	5	2644	3528	1	E																	0									1	2	FALSE	F
NODE_2881_length_13244_cov_4.774964__full-cat_1	6	3521	3847	1	E																	0									2	2	FALSE	F
NODE_2881_length_13244_cov_4.774964__full-cat_1	7	3945	4877	1	E																	0									2	2	FALSE	F
NODE_2881_length_13244_cov_4.774964__full-cat_1	8	4877	5071	1	E																	0									1	2	FALSE	F
NODE_2881_length_13244_cov_4.774964__full-cat_1	9	5065	5415	1	E																	0									2	2	FALSE
NODE_2881_length_13244_cov_4.774964__full-cat_1	10	5530	6084	1	C		hhy:Halhy_5923 hypothetical protein	FALSE	0.283	81	2.84e-15											0									1	2	FALSE
NODE_2881_length_13244_cov_4.774964__full-cat_1	11	6166	7083	1	E																	0									2	2	FALSE
NODE_2881_length_13244_cov_4.774964__full-cat_1	12	7133	7600	1	E																	0									2	2	FALSE
NODE_2881_length_13244_cov_4.774964__full-cat_1	13	7625	8212	1	E																	0									2	2	FALSE
NODE_2881_length_13244_cov_4.774964__full-cat_1	14	8219	8566	1	E																	0									2	2	FALSE	F
NODE_2881_length_13244_cov_4.774964__full-cat_1	15	8569	8700	1	E																	0									2	2	FALSE	F
NODE_2881_length_13244_cov_4.774964__full-cat_1	16	8728	8856	1	E																	0									2	2	FALSE	F
NODE_2881_length_13244_cov_4.774964__full-cat_1	17	8858	9202	1	E																	0									2	2	FALSE	F
NODE_2881_length_13244_cov_4.774964__full-cat_1	18	9202	9765	1	E																	0									2	2	FALSE	F
NODE_2881_length_13244_cov_4.774964__full-cat_1	19	9775	9981	1	E																	0									2	2	FALSE	F
NODE_2881_length_13244_cov_4.774964__full-cat_1	20	9983	10633	1	E																	0									2	2	FALSE	F
NODE_2881_length_13244_cov_4.774964__full-cat_1	21	10772	10912	1	E																	0									2	2	FALSE	F
NODE_2881_length_13244_cov_4.774964__full-cat_1	22	10924	11535	1	C		rlg:Rleg_7204 hypothetical protein	FALSE	0.479	76	3.7e-13	YP_007002089.1	YP_007002089.1 structural protein [Brucella phage Pr]	FALSE	0.53	68	4.07e-12					0									0	4	FALSE	F
NODE_2881_length_13244_cov_4.774964__full-cat_1	23	11536	12186	1	E																	0									2	4	FALSE	F
NODE_2881_length_13244_cov_4.774964__full-cat_1	24	12218	12979	1	E																	0									2	4	FALSE	F
NODE_2881_length_13244_cov_4.774964__full-cat_1	25	12989	13243	1	E																	0									2	5	FALSE	F
NODE_3163_length_12233_cov_12.516752__full-cat_2	1	1	1392	1	E																	0									2	5	FALSE	F
NODE_3163_length_12233_cov_12.516752__full-cat_2	2	1494	3893	1	C		can:Cyan10605_0288 outer membrane adhesin-like protein	FALSE	0.221	60	1.85e-06											0									2	4	FALSE	F
NODE_3163_length_12233_cov_12.516752__full-cat_2	3	3895	4311	1	E																	0									1	4	FALSE	F
NODE_3163_length_12233_cov_12.516752__full-cat_2	4	4350	4997	1	E																	0									1	4	FALSE	F
NODE_3163_length_12233_cov_12.516752__full-cat_2	5	5032	6030	1	E																	0									2	4	FALSE
NODE_3163_length_12233_cov_12.516752__full-cat_2	6	6037	12111	1	E																	0									2	5	FALSE	F
NODE_3577_length_10993_cov_6.024959__full-cat_2	1	1	804	-1	C		lan:Lacal_2927 glutamine cyclotransferase	FALSE	0.644	332	2.09e-100							Glutamine cyclotransferase [PF05096.12]				0									2	5	FALSE	F
NODE_3577_length_10993_cov_6.024959__full-cat_2	2	1198	2001	1	A		lan:Lacal_2926 short-chain dehydrogenase/reductase SDR	TRUE	0.719	388	7.96e-120	YP_803294.1	YP_803294.1 hypothetical protein TNAV2c_gp071 [Trichoplusia ni ascovirus 2c]	FALSE	0.233	68	1.04e-11	short chain dehydrogenase [PF00106.25]; Enoyl-(Acyl carrier protein) reductase [PF13561.6]; KR domain [PF08659.10]; NAD dependent epimerase/dehydratase family [PF01370.21]; GDP-mannose 4,6 dehydratase [PF16363.5]; RmlD substrate binding domain [PF04321.17]; Fungal family of unknown function (DUF1776) [PF08643.10]		REFSEQ hypothetical protein; Xu	Xu	0									2	4	FALSE	MKF
NODE_3577_length_10993_cov_6.024959__full-cat_2	3	2492	3145	1	A	K00616	lan:Lacal_2924 transaldolase; K00616 transaldolase [EC:2.2.1.2]	TRUE	0.889	404	3.66e-126	YP_009188273.1	YP_009188273.1 TalC [Cyanophage P-TIM40]	FALSE	0.476	188	6.1e-53	Transaldolase/Fructose-6-phosphate aldolase [PF00923.19]		sp|B8H6D3|TAL_CAUVN Probable transaldolase; Xh	Xh	0									1	4	FALSE	MKEF
NODE_3577_length_10993_cov_6.024959__full-cat_2	4	3230	4648	-1	C		lan:Lacal_2923 hypothetical protein	FALSE	0.402	327	3.09e-95											0									2	3	FALSE	F
NODE_3577_length_10993_cov_6.024959__full-cat_2	5	4894	6519	1	A		lan:Lacal_2922 ABC transporter-like protein	TRUE	0.87	971	2.86E-316	YP_009665579.1	YP_009665579.1 elongation factor 3 [Paramecium bursaria Chlorella virus NYs1]	FALSE	0.2	111	6.25e-24	ABC transporter [PF00005.27]; ABC transporter [PF12848.7]; RecF/RecN/SMC N terminal domain [PF02463.19]		sp|P03271|PKG1_ADE05 Packaging protein 1; XhXrXs	Xh;Xs;Xr	0									1	4	FALSE	VF
NODE_3577_length_10993_cov_6.024959__full-cat_2	6	6569	6805	-1	C		lan:Lacal_2921 hypothetical protein	FALSE	0.537	79	3.1e-16							Putative prokaryotic signal transducing protein [PF09413.10]				0									2	4	FALSE	F
NODE_3577_length_10993_cov_6.024959__full-cat_2	7	7224	9437	1	A	K03782	lan:Lacal_2205 catalase (EC:1.11.1.6); K03782 catalase-peroxidase [EC:1.11.1.21]	TRUE	0.838	1255	0							Peroxidase [PF00141.23]	AA2 manganese peroxidase (EC 1.11.1.13); versatile peroxidase (EC 1.11.1.16); lignin peroxidase (EC 1.11.1.14); peroxidase (EC 1.11.1.-) [AA2]; AA2 manganese peroxidase (EC 1.11.1.13); versatile peroxidase (EC 1.11.1.16); lignin peroxidase (EC 1.11.1.14); peroxidase (EC 1.11.1.-) [AA2]; AA2 manganese peroxidase (EC 1.11.1.13); versatile peroxidase (EC 1.11.1.16); lignin peroxidase (EC 1.11.1.14);…			0									2	4	FALSE	MKF
NODE_3577_length_10993_cov_6.024959__full-cat_2	8	9576	10046	1	C	K06867	lan:Lacal_2206 ankyrin; K06867	FALSE	0.582	177	1.28e-48	YP_003986584.1	YP_003986584.1 putative ankyrin repeat protein [Acanthamoeba polyphaga mimivirus]	FALSE	0.382	87	3.39e-19	Ankyrin repeats (3 copies) [PF12796.7]; Ankyrin repeats (many copies) [PF13637.6]; Ankyrin repeats (many copies) [PF13857.6]; Ankyrin repeat [PF00023.30]; Patatin-like phospholipase [PF01734.22]				0									2	4	FALSE	MKF
NODE_3577_length_10993_cov_6.024959__full-cat_2	9	10221	10478	-1	C		lan:Lacal_2223 hypothetical protein	FALSE	0.864	153	8.02e-42											0									2	4	FALSE	F
NODE_3577_length_10993_cov_6.024959__full-cat_2	10	10533	10841	-1	C		lan:Lacal_2224 thioredoxin domain-containing protein	FALSE	0.776	162	9.24e-45							Thioredoxin [PF00085.20]; Thioredoxin-like [PF13899.6]; Thioredoxin-like [PF13905.6]				0									2	4	FALSE	F
NODE_3577_length_10993_cov_6.024959__full-cat_2	11	10917	10991	-1	E																	0									2	5	FALSE	F
NODE_3984_length_10107_cov_6.132411__full-cat_1	1	1	1587	1	E							YP_008241478.1	YP_008241478.1 structural protein [Cellulophaga phage phi38:1]	FALSE	0.248	66	4.89e-10					0									0	5	FALSE	F
NODE_3984_length_10107_cov_6.132411__full-cat_1	2	1600	2853	1	E																	0									2	2	FALSE	F
NODE_3984_length_10107_cov_6.132411__full-cat_1	3	2864	3202	1	E																	0									1	2	FALSE	F
NODE_3984_length_10107_cov_6.132411__full-cat_1	4	3255	3914	1	E																	0									2	2	FALSE	F
NODE_3984_length_10107_cov_6.132411__full-cat_1	5	3890	5308	1	E																	0									1	4	FALSE	F
NODE_3984_length_10107_cov_6.132411__full-cat_1	6	5310	7286	1	E																	0									2	4	FALSE	F
NODE_3984_length_10107_cov_6.132411__full-cat_1	7	7288	10107	1	E																	0									2	5	FALSE	F
NODE_4108_length_9846_cov_8.842815__full-cat_2	1	1	471	1	E																	0									1	5	FALSE	F
NODE_4108_length_9846_cov_8.842815__full-cat_2	2	468	2561	1	E																	0									2	3	FALSE	F
NODE_4108_length_9846_cov_8.842815__full-cat_2	3	2567	9793	1	D													Large polyvalent protein associated domain 38 [PF18857.1]				0									1	5	FALSE	F
NODE_4230_length_9664_cov_8.102612__full-cat_2	1	779	2170	1	C		mbs:MRBBS_2044 intF; prophage CP4-6 integrase	FALSE	0.239	97	3.16e-18							Phage integrase family [PF00589.22]		sp|O10330|VLF1_NPVOP Very late expression factor 1; Xr	Xr	0									1	5	FALSE	VF
NODE_4230_length_9664_cov_8.102612__full-cat_2	2	2190	3113	-1	C		oar:OA238_c41620 hypothetical protein	FALSE	0.577	299	4.65e-88	YP_004895098.1	YP_004895098.1 putative Sel1-like repeat-containing protein [Megavirus chiliensis]	FALSE	0.343	125	3.06e-30	Sel1 repeat [PF08238.12]				0									2	3	FALSE	F
NODE_4230_length_9664_cov_8.102612__full-cat_2	3	3243	3812	-1	E																	0									2	3	FALSE	F
NODE_4230_length_9664_cov_8.102612__full-cat_2	4	3812	4105	-1	E																	0									2	3	FALSE	F
NODE_4230_length_9664_cov_8.102612__full-cat_2	5	4772	5323	-1	E																	0									1	3	FALSE	F
NODE_4230_length_9664_cov_8.102612__full-cat_2	6	5320	6690	-1	C		sch:Sphch_1990 bifunctional DNA primase/polymerase	FALSE	0.332	130	9.66e-29	YP_007006482.1	YP_007006482.1 hypothetical protein 7-7-1_00026 [Agrobacterium phage 7-7-1]	FALSE	0.286	106	7.15e-23					0									1	4	FALSE	F
NODE_4230_length_9664_cov_8.102612__full-cat_2	7	6665	6913	-1	E																	0									2	5	FALSE	F
NODE_4528_length_9154_cov_13.955819__full-cat_2	1	1	7143	-1	E																	0									1	5	FALSE	F
NODE_4528_length_9154_cov_13.955819__full-cat_2	2	7154	8230	-1	E																	0									2	3	FALSE	F
NODE_4528_length_9154_cov_13.955819__full-cat_2	3	8249	9070	-1	E																	0									1	5	FALSE	F
NODE_4729_length_8836_cov_6.444596__full-cat_2	1	1	606	1	E																	0										5	FALSE	F
NODE_4729_length_8836_cov_6.444596__full-cat_2	2	603	1745	1	C		sfh:SFHH103_03395 hypothetical protein	FALSE	0.469	301	1.27e-87	YP_002290948.1	YP_002290948.1 putative phage DNA-binding protein [Clostridium virus phiCD27]	FALSE	0.28	148	5.3e-37	IrrE N-terminal-like domain [PF06114.13]; Helix-turn-helix domain [PF12844.7]		sp|P10426|YIM2_BPPH1 Uncharacterized immunity region protein 2; Xu	Xu	0	MER0909509	M78	MER0909509 - family M78 non-peptidase homologues (Pseudomonas aeruginosa) [M78.UNW]#M78#{peptidase unit: 98-190}~source A0A0C6F8X4~	FALSE	0.513	87	1.03e-16			4	FALSE	PF
NODE_4729_length_8836_cov_6.444596__full-cat_2	3	1799	2026	-1	E																	0										4	FALSE	F
NODE_4729_length_8836_cov_6.444596__full-cat_2	4	2023	2451	-1	E																	0										4	FALSE	F
NODE_4729_length_8836_cov_6.444596__full-cat_2	5	2441	2704	-1	E																	0										4	FALSE	F
NODE_4729_length_8836_cov_6.444596__full-cat_2	6	2701	2895	-1	E																	0										4	FALSE	F
NODE_4729_length_8836_cov_6.444596__full-cat_2	7	2897	3367	-1	C		bbr:BB4144 hypothetical protein	FALSE	0.597	156	1.24e-41											0										4	FALSE	F
NODE_4729_length_8836_cov_6.444596__full-cat_2	8	3398	4129	-1	C		xfm:Xfasm12_1675 hypothetical protein	FALSE	0.376	149	1.09e-37											0										3	FALSE	F
NODE_4729_length_8836_cov_6.444596__full-cat_2	9	4573	6060	-1	C		rva:Rvan_3126 hypothetical protein	FALSE	0.283	179	8.92e-45	YP_009285867.1	YP_009285867.1 putative primase/helicase [Pseudomonas phage NP1]	FALSE	0.345	259	3.28e-73	Protein of unknown function (DUF3987) [PF13148.6]		sp|P10277|PRIM_BPP4 Putative P4-specific DNA primase; XhXr	Xh;Xr	0										3	FALSE	VF
NODE_4729_length_8836_cov_6.444596__full-cat_2	10	6248	6457	-1	C		pnc:NCGM2_5618 hypothetical protein	FALSE	0.63	88	1.36e-19											0										3	FALSE	F
NODE_4729_length_8836_cov_6.444596__full-cat_2	11	6725	8008	-1	A		pnc:NCGM2_5619 hypothetical protein	TRUE	0.764	661	2.51e-211							Phage integrase family [PF00589.22]; Arm DNA-binding domain [PF13356.6]		sp|O10330|VLF1_NPVOP Very late expression factor 1; Xr	Xr	0										3	FALSE	VF
NODE_4877_length_8655_cov_4.295116__full-cat_1	1	1	210	-1	E																	0									1	5	FALSE	F
NODE_4877_length_8655_cov_4.295116__full-cat_1	2	255	584	-1	E																	0									1	2	FALSE	F
NODE_4877_length_8655_cov_4.295116__full-cat_1	3	597	1907	-1	E																	0									2	2	FALSE	F
NODE_4877_length_8655_cov_4.295116__full-cat_1	4	1935	8654	-1	E							YP_008241154.1	YP_008241154.1 structural protein [Cellulophaga phage phi46:3]	FALSE	0.295	139	2.2e-31					0									0	5	FALSE	F
NODE_5036_length_8438_cov_34.631516__full-cat_2	1	1	345	-1	E																	0									2	5	FALSE	F
NODE_5036_length_8438_cov_34.631516__full-cat_2	2	503	1876	-1	A	K05844	cao:Celal_1836 30S ribosomal protein S6; K05844 ribosomal protein S6 modification protein	TRUE	0.775	717	7.03e-230	YP_009301638.1	YP_009301638.1 hypothetical protein R1080702_136 [Cyanophage S-RIM32]	FALSE	0.352	158	1.52e-39	RimK-like ATP-grasp domain [PF08443.11]; Putative ATP-dependant zinc protease [PF05618.11]; RimK PreATP-grasp domain [PF18030.1]; Prokaryotic glutathione synthetase, ATP-grasp domain [PF02955.16]; Sugar-transfer associated ATP-grasp [PF14397.6]; D-ala D-ala ligase C-terminus [PF07478.13]; YheC/D like ATP-grasp [PF14398.6]; Phosphoribosylglycinamide synthetase, ATP-grasp (A) domain [PF01071.19]		sp|A0KFE0|RIMK_AERHH Probable alpha-L-glutamate ligase; Xh	Xh	0									2	4	FALSE	F
NODE_5036_length_8438_cov_34.631516__full-cat_2	3	1905	3431	-1	A		zga:zobellia_2018 N-acetyltransferase	TRUE	0.863	910	9.88e-296	YP_001426650.1	YP_001426650.1 hypothetical protein ATCV1_Z169R [Acanthocystis turfacea chlorella virus 1]	FALSE	0.229	62	5.63e-09	Carbon-nitrogen hydrolase [PF00795.22]				0									2	4	FALSE	F
NODE_5036_length_8438_cov_34.631516__full-cat_2	4	3713	4153	-1	D													NUDIX domain [PF00293.28]				0									1	4	FALSE	F
NODE_5036_length_8438_cov_34.631516__full-cat_2	5	4175	4480	-1	C		lan:Lacal_0651 hypothetical protein	FALSE	0.722	142	8.93e-38											0									2	4	FALSE	F
NODE_5036_length_8438_cov_34.631516__full-cat_2	6	4483	5457	-1	A	K00809	lan:Lacal_0652 deoxyhypusine synthase; K00809 deoxyhypusine synthase [EC:2.5.1.46]	TRUE	0.943	641	2.9e-206							Deoxyhypusine synthase [PF01916.17]				0									2	4	FALSE	F
NODE_5036_length_8438_cov_34.631516__full-cat_2	7	5447	6385	-1	A	K01480	lan:Lacal_0653 agmatinase (EC:3.5.3.11); K01480 agmatinase [EC:3.5.3.11]	TRUE	0.838	542	3.71e-172	YP_009173394.1	YP_009173394.1 Arginase [Chrysochromulina ericina virus]	FALSE	0.253	63	1.45e-09	Arginase family [PF00491.21]				0									2	4	FALSE	MKF
NODE_5036_length_8438_cov_34.631516__full-cat_2	8	6389	7849	-1	A	K01585	lan:Lacal_0654 Orn/DAP/Arg decarboxylase 2; K01585 arginine decarboxylase [EC:4.1.1.19]	TRUE	0.886	855	2.68e-277							Pyridoxal-dependent decarboxylase, pyridoxal binding domain [PF02784.16]				0									2	5	FALSE	F
NODE_5051_length_8425_cov_12.414695__full-cat_1	1	1	999	1	C	K00612	bgf:BC1003_4062 Carbamoyltransferase; K00612 carbamoyltransferase [EC:2.1.3.-]	FALSE	0.343	204	3.69e-55	YP_007518026.1	YP_007518026.1 carbamoyltransferase [Pelagibacter phage HTVC008M]	FALSE	0.279	136	2.05e-33	Carbamoyltransferase C-terminus [PF16861.5]; Carbamoyltransferase N-terminus [PF02543.15]		sp|Q70IY1|TOBZ_STRSD nebramycin 5' synthase; Xh	Xh	0									1	5	FALSE	MKF
NODE_5051_length_8425_cov_12.414695__full-cat_1	2	941	1633	1	C		pub:SAR11_0482 hypothetical protein	FALSE	0.364	109	4.36e-24	YP_009594840.1	YP_009594840.1 restriction endonuclease type II like-protein [Pectobacterium phage CBB]	FALSE	0.415	130	5.33e-33			REFSEQ hypothetical protein; Xu	Xu	0									1	2	FALSE	F
NODE_5051_length_8425_cov_12.414695__full-cat_1	3	1602	2108	1	E																	0									2	2	FALSE	F
NODE_5051_length_8425_cov_12.414695__full-cat_1	4	2092	2256	1	E																	0									2	2	FALSE	F
NODE_5051_length_8425_cov_12.414695__full-cat_1	5	2237	2413	1	E																	0									2	2	FALSE	F
NODE_5051_length_8425_cov_12.414695__full-cat_1	6	2406	3278	1	E																	0									2	2	FALSE	F
NODE_5051_length_8425_cov_12.414695__full-cat_1	7	3337	3948	1	C		fjo:Fjoh_0321 type 12 methyltransferase	FALSE	0.509	198	4e-55											0									2	2	FALSE	F
NODE_5051_length_8425_cov_12.414695__full-cat_1	8	3963	4241	1	E							YP_004421500.1	YP_004421500.1 unnamed protein product [Synechococcus phage S-CBS2]	FALSE	0.689	111	7.39e-29			REFSEQ hypothetical protein; Xu	Xu	0									1	2	FALSE	F
NODE_5051_length_8425_cov_12.414695__full-cat_1	9	4235	4441	1	E																	0									2	2	FALSE	F
NODE_5051_length_8425_cov_12.414695__full-cat_1	10	4422	5270	1	C	K03791	gem:GM21_3679 lytic enzyme; K03791 putative chitinase	FALSE	0.511	188	1.65e-50	YP_009277044.1	YP_009277044.1 putative chitinase [Ralstonia phage RSP15]	FALSE	0.472	174	4.11e-47	Chitinase class I [PF00182.19]; Putative peptidoglycan binding domain [PF01471.18]	GH19 chitinase (EC 3.2.1.14); lysozyme (EC 3.2.1.17) [GH19]			0									0	3	FALSE	AF
NODE_5051_length_8425_cov_12.414695__full-cat_1	11	5310	6377	1	A		psf:PSE_3176 ABC transporter substrate-binding protein	TRUE	0.578	397	2.67e-121							ABC transporter substrate-binding protein PnrA-like [PF02608.14]				0									1	2	FALSE	F
NODE_5051_length_8425_cov_12.414695__full-cat_1	12	6440	6586	1	E																	0									2	2	FALSE	F
NODE_5051_length_8425_cov_12.414695__full-cat_1	13	6595	7479	1	D							YP_004324957.1	YP_004324957.1 tRNA ligase [Prochlorococcus phage P-SSM7]	TRUE	0.699	376	1.51e-116	tRNA synthetases class II (D, K and N) [PF00152.20]				0									1	4	FALSE	F
NODE_5051_length_8425_cov_12.414695__full-cat_1	14	7586	8425	1	C		bfo:BRAFLDRAFT_88430 hypothetical protein	FALSE	0.334	151	1.46e-37							2OG-Fe(II) oxygenase superfamily [PF03171.20]; non-haem dioxygenase in morphine synthesis N-terminal [PF14226.6]				0									2	5	FALSE	MKF
NODE_5363_length_8047_cov_7.240616__full-cat_2	1	1	4764	-1	E																	0									2	5	FALSE	F
NODE_5363_length_8047_cov_7.240616__full-cat_2	2	4718	5206	-1	E																	0									2	4	FALSE	F
NODE_5363_length_8047_cov_7.240616__full-cat_2	3	5210	6904	-1	E																	0									2	4	FALSE	F
NODE_5363_length_8047_cov_7.240616__full-cat_2	4	6909	8021	-1	E																	0									1	5	FALSE	F
NODE_5367_length_8041_cov_4.784748__full-cat_2	1	1	387	1	E																	0									2	5	FALSE	F
NODE_5367_length_8041_cov_4.784748__full-cat_2	2	408	794	1	E																	0									1	4	FALSE	F
NODE_5367_length_8041_cov_4.784748__full-cat_2	3	794	1114	1	E																	0									2	3	FALSE	F
NODE_5367_length_8041_cov_4.784748__full-cat_2	4	1111	2361	1	C	K03696	cpy:Cphy_3461 ATPase; K03696 ATP-dependent Clp protease ATP-binding subunit ClpC	FALSE	0.363	226	1.65e-61	YP_009153153.1	YP_009153153.1 hypothetical protein [Klebsiella phage K64-1]	FALSE	0.373	169	9.2e-44	AAA domain (Cdc48 subfamily) [PF07724.14]; Sigma-54 interaction domain [PF00158.26]; C-terminal, D2-small domain, of ClpB protein [PF10431.9]; AAA domain (dynein-related subfamily) [PF07728.14]; ATPase family associated with various cellular activities (AAA) [PF00004.29]				0									1	3	FALSE	F
NODE_5367_length_8041_cov_4.784748__full-cat_2	5	2333	2596	1	E																	0									2	3	FALSE	F
NODE_5367_length_8041_cov_4.784748__full-cat_2	6	2630	2893	1	E																	0									2	3	FALSE	F
NODE_5367_length_8041_cov_4.784748__full-cat_2	7	2967	3695	1	C		sus:Acid_6226 nucleotidyl transferase	FALSE	0.606	278	3.78e-82	YP_009012397.1	YP_009012397.1 Phi92_gp066 [Enterobacteria phage phi92]	FALSE	0.49	217	1.35e-62	Nucleotidyl transferase [PF00483.23]; MobA-like NTP transferase domain [PF12804.7]		sp|Q5UNV4|UNAP_MIMIV Probable UDP-N-acetylglucosamine pyrophosphorylase; Xh	Xh	0									1	3	FALSE	F
NODE_5367_length_8041_cov_4.784748__full-cat_2	8	3682	4662	1	C	K01710	hvo:HVO_2059 galE5; UDP-glucose 4-epimerase (EC:5.1.3.2); K01710 dTDP-glucose 4,6-dehydratase [EC:4.2.1.46]	FALSE	0.473	248	1.94e-70	YP_009012398.1	YP_009012398.1 Phi92_gp067 [Enterobacteria phage phi92]	FALSE	0.405	209	1.25e-58	GDP-mannose 4,6 dehydratase [PF16363.5]; NAD dependent epimerase/dehydratase family [PF01370.21]; RmlD substrate binding domain [PF04321.17]; 3-beta hydroxysteroid dehydrogenase/isomerase family [PF01073.19]; Polysaccharide biosynthesis protein [PF02719.15]; Male sterility protein [PF07993.12]		sp|Q9EQC1|3BHS7_MOUSE 3 beta-hydroxysteroid dehydrogenase type 7; Xh	Xh	0									1	4	FALSE	MKF
NODE_5367_length_8041_cov_4.784748__full-cat_2	9	4659	5345	1	C	K00067	ddr:Deide_20253 dTDP-4-dehydrorhamnose reductase; K00067 dTDP-4-dehydrorhamnose reductase [EC:1.1.1.133]	FALSE	0.348	120	9.32e-28	YP_009012395.1	YP_009012395.1 Phi92_gp064 [Enterobacteria phage phi92]	FALSE	0.275	64	1.93e-10	RmlD substrate binding domain [PF04321.17]; NAD dependent epimerase/dehydratase family [PF01370.21]; 3-beta hydroxysteroid dehydrogenase/isomerase family [PF01073.19]; Polysaccharide biosynthesis protein [PF02719.15]; GDP-mannose 4,6 dehydratase [PF16363.5]		sp|Q9EQC1|3BHS7_MOUSE 3 beta-hydroxysteroid dehydrogenase type 7; Xh	Xh	0									2	4	FALSE	MKF
NODE_5367_length_8041_cov_4.784748__full-cat_2	10	5353	5781	1	E																	0									2	4	FALSE	F
NODE_5367_length_8041_cov_4.784748__full-cat_2	11	5786	6565	1	E																	0									2	4	FALSE	F
NODE_5367_length_8041_cov_4.784748__full-cat_2	12	6651	7136	1	C		cts:Ctha_0903 4-diphosphocytidyl-2-methyl-D-erythritol synthase	FALSE	0.432	100	5.42e-22											0									2	4	FALSE	F
NODE_5367_length_8041_cov_4.784748__full-cat_2	13	7190	7393	1	E																	0									2	4	FALSE	F
NODE_5367_length_8041_cov_4.784748__full-cat_2	14	7416	7835	1	E																	0									2	5	FALSE	F
NODE_5394_length_7999_cov_7.943353__full-cat_1	1	1	6693	-1	E							YP_008242152.1	YP_008242152.1 hypothetical protein Phi13:2_gp127 [Cellulophaga phage phi13:2]	FALSE	0.192	106	2.26e-21					0									0	5	FALSE	F
NODE_5394_length_7999_cov_7.943353__full-cat_1	2	6694	7983	-1	E																	0									2	5	FALSE	F
NODE_5542_length_7840_cov_4.417855__full-cat_1	1	1	156	1	E																	0									2	5	FALSE	F
NODE_5542_length_7840_cov_4.417855__full-cat_1	2	153	380	1	E																	0									2	4	FALSE	F
NODE_5542_length_7840_cov_4.417855__full-cat_1	3	377	604	1	E																	0									2	4	FALSE	F
NODE_5542_length_7840_cov_4.417855__full-cat_1	4	546	863	1	E																	0									2	4	FALSE	F
NODE_5542_length_7840_cov_4.417855__full-cat_1	5	860	1363	1	E																	0									2	4	FALSE	F
NODE_5542_length_7840_cov_4.417855__full-cat_1	6	1363	1833	1	E																	0									2	4	FALSE	F
NODE_5542_length_7840_cov_4.417855__full-cat_1	7	1886	3196	1	C		tit:Thit_1395 hypothetical protein	FALSE	0.312	196	4.42e-51	YP_024846.1	YP_024846.1 Pas60 [Actinoplanes phage phiAsp2]	FALSE	0.222	113	4.04e-25	Terminase-like family [PF03237.15]		sp|Q05219|VG13_BPML5 Gene 13 protein; Xu	Xu	0									0	4	FALSE	F
NODE_5542_length_7840_cov_4.417855__full-cat_1	8	3245	3496	1	E																	0									2	1	FALSE	F
NODE_5542_length_7840_cov_4.417855__full-cat_1	9	3493	4044	1	C		dvl:Dvul_1051 hypothetical protein	FALSE	0.307	80	6.99e-15	YP_009210600.1	YP_009210600.1 ATPase-like protein [Paenibacillus phage Tripp]	FALSE	0.288	74	2.39e-14	Phosphomevalonate kinase [PF04275.14]		sp|Q7Y4Y9|DNMK_BPR69 Deoxynucleotide monophosphate kinase; Xh	Xh	0									0	2	FALSE	F
NODE_5542_length_7840_cov_4.417855__full-cat_1	10	4130	6034	1	E																	0									1	2	FALSE	F
NODE_5542_length_7840_cov_4.417855__full-cat_1	11	6306	7247	1	E																	0									1	2	FALSE	F
NODE_5542_length_7840_cov_4.417855__full-cat_1	12	7266	7838	1	E																	0									1	5	FALSE	F
NODE_5628_length_7756_cov_5.949357__full-cat_1	1	1	1128	-1	C		bae:BATR1942_08060 SPbeta phage protein; lytic transglycosylase	FALSE	0.278	145	1.65e-34	NP_046584.1	NP_046584.1 putative transglycosylase [Bacillus virus SPbeta]	FALSE	0.303	136	3.15e-33	Phage-related minor tail protein [PF10145.9]				0									0	5	FALSE	F
NODE_5628_length_7756_cov_5.949357__full-cat_1	2	1198	2256	-1	E																	0									1	1	FALSE	F
NODE_5628_length_7756_cov_5.949357__full-cat_1	3	2256	3362	-1	E																	0									1	1	FALSE	F
NODE_5628_length_7756_cov_5.949357__full-cat_1	4	3378	3680	-1	E																	0									1	1	FALSE	F
NODE_5628_length_7756_cov_5.949357__full-cat_1	5	3778	4734	-1	E																	0									1	1	FALSE	F
NODE_5628_length_7756_cov_5.949357__full-cat_1	6	4796	5668	-1	E																	0									1	1	FALSE	F
NODE_5628_length_7756_cov_5.949357__full-cat_1	7	5668	6252	-1	E																	0									1	1	FALSE	F
NODE_5628_length_7756_cov_5.949357__full-cat_1	8	6254	6697	-1	E																	0									1	1	FALSE	F
NODE_5628_length_7756_cov_5.949357__full-cat_1	9	6697	7218	-1	E																	0									1	1	FALSE	F
NODE_5628_length_7756_cov_5.949357__full-cat_1	10	7241	7753	-1	E															REFSEQ hypothetical protein; Xu	Xu	0									0	5	FALSE	F
NODE_5673_length_7713_cov_3.731523__full-cat_1	1	1	288	1	C		sjp:SJA_C1-26620 putative permease	FALSE	0.709	131	6.49e-34							Lipopolysaccharide export system permease LptF/LptG [PF03739.14]				0									2	5	FALSE	F
NODE_5673_length_7713_cov_3.731523__full-cat_1	2	328	1404	1	A	K11720	ssy:SLG_01110 putative permease; K11720 lipopolysaccharide export system permease protein	TRUE	0.622	398	1.62e-121							Lipopolysaccharide export system permease LptF/LptG [PF03739.14]				0									2	4	FALSE	MF
NODE_5673_length_7713_cov_3.731523__full-cat_1	3	1243	2292	-1	A		sal:Sala_2178 fatty acid desaturase	TRUE	0.675	418	1.65e-128											0									2	4	FALSE	F
NODE_5673_length_7713_cov_3.731523__full-cat_1	4	2482	3429	1	A		swi:Swit_3908 hypothetical protein	TRUE	0.674	412	3.07e-127											0									2	4	FALSE	F
NODE_5673_length_7713_cov_3.731523__full-cat_1	5	3465	3635	1	C		sch:Sphch_1517 hypothetical protein	FALSE	0.809	96	1.7e-22											0									2	4	FALSE	F
NODE_5673_length_7713_cov_3.731523__full-cat_1	6	3709	4497	-1	A	K01142	sjp:SJA_C1-26680 xthA; exodeoxyribonuclease III (EC:3.1.11.2); K01142 exodeoxyribonuclease III [EC:3.1.11.2]	TRUE	0.808	435	3.3e-136	YP_003969738.1	YP_003969738.1 putative apurinic-apyrimidinic endonuclease 1 [Cafeteria roenbergensis virus BV-PW1]	FALSE	0.233	78	7.42e-15	Endonuclease/Exonuclease/phosphatase family [PF03372.23]		sp|P43138|APEX1_RAT DNA-(apurinic or apyrimidinic site) lyase; XhXr	Xh;Xr	0									2	4	FALSE	VF
NODE_5673_length_7713_cov_3.731523__full-cat_1	7	4509	4928	-1	C		sjp:SJA_C1-26690 hypothetical protein	FALSE	0.762	167	1.6e-45							Iron-sulphur cluster biosynthesis [PF01521.20]		sp|A0KNY6|ERPA_AERHH Iron-sulfur cluster insertion protein ErpA; Xh	Xh	0									1	4	FALSE	F
NODE_5673_length_7713_cov_3.731523__full-cat_1	8	5029	5730	-1	C		sphm:G432_06200 peptidase M23B	FALSE	0.609	216	9.95e-61	YP_009199099.1	YP_009199099.1 putative peptidase M23 [Brevibacillus phage Jenst]	FALSE	0.39	99	3.56e-22	Peptidase family M23 [PF01551.22]				0	MER0274236	M23B	MER0274236 - subfamily M23B unassigned peptidases (Sphingobium sp. SYK-6) [M23.UPB]#M23B#{peptidase unit: 62-214}~source YP_004836730~	FALSE	0.674	205	3.39e-58		0	4	FALSE	PF
NODE_5673_length_7713_cov_3.731523__full-cat_1	9	5839	6564	-1	C		sch:Sphch_1523 hypothetical protein	FALSE	0.671	322	1.74e-97							Protein of unknown function (DUF455) [PF04305.14]				0									2	4	FALSE	F
NODE_5673_length_7713_cov_3.731523__full-cat_1	10	6671	7132	-1	C	K03564	swi:Swit_3920 alkyl hydroperoxide reductase; K03564 peroxiredoxin Q/BCP [EC:1.11.1.15]	FALSE	0.591	172	4.96e-47							AhpC/TSA family [PF00578.21]; Redoxin [PF08534.10]; SCO1/SenC [PF02630.14]				0									2	4	FALSE	F
NODE_5673_length_7713_cov_3.731523__full-cat_1	11	7129	7710	-1	C	K00982	sch:Sphch_1525 (glutamate--ammonia-ligase) adenylyltransferase (EC:2.7.7.42); K00982 glutamate-ammonia-ligase adenylyltransferase [EC:2.7.7.42]	FALSE	0.518	173	1.07e-46							GlnD PII-uridylyltransferase [PF08335.11]; Glutamate-ammonia ligase adenylyltransferase [PF03710.15]				0									2	5	FALSE	F
NODE_5748_length_7640_cov_7.580488__lt2gene-cat_1	1	3	7058	1	E							YP_008241478.1	YP_008241478.1 structural protein [Cellulophaga phage phi38:1]	FALSE	0.154	201	4.48e-50			REFSEQ structural protein; Xu	Xu	0									0	5	FALSE	F
NODE_5748_length_7640_cov_7.580488__lt2gene-cat_1	2	7069	7638	1	E																	0									1	5	FALSE	F
NODE_6025_length_7347_cov_5.793884__full-cat_2	1	1	309	-1	E																	0									2	5	FALSE	F
NODE_6025_length_7347_cov_5.793884__full-cat_2	2	333	887	-1	E																	0									1	4	FALSE	F
NODE_6025_length_7347_cov_5.793884__full-cat_2	3	891	1859	-1	E																	0									2	3	FALSE	F
NODE_6025_length_7347_cov_5.793884__full-cat_2	4	1840	3219	-1	E																	0									1	3	FALSE	F
NODE_6025_length_7347_cov_5.793884__full-cat_2	5	3234	4019	-1	E																	0									1	3	FALSE	F
NODE_6025_length_7347_cov_5.793884__full-cat_2	6	4016	4249	-1	E																	0									1	3	FALSE	F
NODE_6025_length_7347_cov_5.793884__full-cat_2	7	4276	7284	-1	C		cthe:Chro_2335 Hedgehog/intein hint domain-containing protein	FALSE	0.353	84	1.62e-13							Pretoxin HINT domain [PF07591.11]				0	MER0195421	N10	MER0195421 - family N10 unassigned peptide lyases (Streptomyces sp. Mg1) [N10.UPW]#N10#{peptidase unit: 2014-2156}~source EDX23690~	FALSE	0.333	78	5.42e-13		1	5	FALSE	F
NODE_6034_length_7336_cov_6.345832__full-cat_2	1	1	186	1	E																	0									2	5	FALSE	F
NODE_6034_length_7336_cov_6.345832__full-cat_2	2	198	6089	1	E																	0									1	4	FALSE	F
NODE_6034_length_7336_cov_6.345832__full-cat_2	3	6121	7335	1	E																	0									1	5	FALSE	F
NODE_6184_length_7180_cov_32.779789__full-cat_2	1	191	583	-1	E							YP_009664998.1	YP_009664998.1 hypothetical protein MPXG_00127 [Micromonas pusilla virus SP1]	FALSE	0.617	160	4e-45					0									2	3	FALSE	F
NODE_6184_length_7180_cov_32.779789__full-cat_2	2	649	969	-1	E							YP_004062088.1	YP_004062088.1 hypothetical protein MpV1_205c [Micromonas sp. RCC1109 virus MpV1]	FALSE	0.536	110	3.65e-28					0									2	3	FALSE	F
NODE_6184_length_7180_cov_32.779789__full-cat_2	3	1050	1316	1	E							YP_007676261.1	YP_007676261.1 hypothetical protein MPVG_00196 [Micromonas pusilla virus 12T]	FALSE	0.578	90	2.27e-21			REFSEQ hypothetical protein; Xu	Xu	0									1	3	FALSE	F
NODE_6184_length_7180_cov_32.779789__full-cat_2	4	1306	1539	-1	E																	0									2	3	FALSE	F
NODE_6184_length_7180_cov_32.779789__full-cat_2	5	1556	1846	-1	E							YP_004062090.1	YP_004062090.1 hypothetical protein MpV1_207c [Micromonas sp. RCC1109 virus MpV1]	FALSE	0.583	94	1e-22			REFSEQ hypothetical protein; Xu	Xu	0									1	3	FALSE	F
NODE_6184_length_7180_cov_32.779789__full-cat_2	6	1870	2154	-1	E							YP_007676265.1	YP_007676265.1 hypothetical protein MPVG_00200 [Micromonas pusilla virus 12T]	FALSE	0.527	96	1.88e-23					0									2	3	FALSE	F
NODE_6184_length_7180_cov_32.779789__full-cat_2	7	2243	3238	1	D							YP_007676266.1	YP_007676266.1 hypothetical protein MPVG_00201 [Micromonas pusilla virus 12T]	FALSE	0.448	267	3.14e-78	Helix-hairpin-helix domain [PF14716.6]		REFSEQ hypothetical protein; Xu	Xu	0									2	3	FALSE	F
NODE_6184_length_7180_cov_32.779789__full-cat_2	8	3284	3784	-1	E							YP_004062095.1	YP_004062095.1 hypothetical protein MpV1_212c [Micromonas sp. RCC1109 virus MpV1]	FALSE	0.767	255	2.62e-77			REFSEQ hypothetical protein; Xu	Xu	0									2	3	FALSE	F
NODE_6184_length_7180_cov_32.779789__full-cat_2	9	3898	4446	1	E							YP_007676292.1	YP_007676292.1 hypothetical protein MPVG_00228 [Micromonas pusilla virus 12T]	FALSE	0.447	161	2.05e-44			REFSEQ hypothetical protein; Xu	Xu	0									1	3	FALSE	F
NODE_6184_length_7180_cov_32.779789__full-cat_2	10	4286	4921	-1	C		mis:MICPUN_61749 hypothetical protein	FALSE	0.298	71	1.78e-11	YP_004062096.1	YP_004062096.1 hypothetical protein MpV1_213c [Micromonas sp. RCC1109 virus MpV1]	FALSE	0.72	223	3.29e-65			REFSEQ hypothetical protein; Xu	Xu	0									1	3	FALSE	F
NODE_6184_length_7180_cov_32.779789__full-cat_2	11	5462	6031	1	E							YP_007676269.1	YP_007676269.1 hypothetical protein MPVG_00204 [Micromonas pusilla virus 12T]	FALSE	0.605	213	3.34e-62			REFSEQ hypothetical protein; Xu	Xu	0									1	3	FALSE	F
NODE_6184_length_7180_cov_32.779789__full-cat_2	12	6058	6240	1	C		mpp:MICPUCDRAFT_58044 SNF2 super family	FALSE	0.693	76	1.2e-15	YP_007676278.1	YP_007676278.1 ubiquitin [Micromonas pusilla virus 12T]	FALSE	0.576	68	1.67e-14	HMG (high mobility group) box [PF00505.19]; HMG-box domain [PF09011.10]				0									2	3	FALSE	F
NODE_6184_length_7180_cov_32.779789__full-cat_2	13	6366	6845	1	C		val:VDBG_01531 glycerophosphodiester phosphodiesterase GDE1	FALSE	0.395	83	3.6e-16	YP_009701850.1	YP_009701850.1 ankyrin repeat PH and SEC7 domain containing protein [Paramecium bursaria Chlorella virus CVA-1]	FALSE	0.417	77	1.29e-15	Ankyrin repeats (3 copies) [PF12796.7]; Ankyrin repeats (many copies) [PF13857.6]; Ankyrin repeats (many copies) [PF13637.6]; Ankyrin repeat [PF13606.6]; Ankyrin repeat [PF00023.30]				0									2	3	FALSE	F
NODE_6184_length_7180_cov_32.779789__full-cat_2	14	6859	7176	1	C		pgr:PGTG_21338 dUTP pyrophosphatase	FALSE	0.699	145	8.59e-39	YP_004062097.1	YP_004062097.1 hypothetical protein MpV1_214 [Micromonas sp. RCC1109 virus MpV1]	FALSE	0.877	196	7.5e-58	dUTPase [PF00692.19]				0									1	5	FALSE	F
NODE_6225_length_7141_cov_6.287750__full-cat_2	1	1	1662	-1	E																	0									1	5	FALSE	F
NODE_6225_length_7141_cov_6.287750__full-cat_2	2	1662	5918	-1	E																	0									2	3	FALSE	F
NODE_6225_length_7141_cov_6.287750__full-cat_2	3	5918	6502	-1	E																	0									1	4	FALSE	F
NODE_6225_length_7141_cov_6.287750__full-cat_2	4	6504	7007	-1	E																	0									2	5	FALSE	F
NODE_6445_length_6965_cov_100.921852__full-cat_2	1	1	2421	1	E																	0									1	5	FALSE	F
NODE_6445_length_6965_cov_100.921852__full-cat_2	2	2426	6646	1	E																	0									1	4	FALSE	F
NODE_6445_length_6965_cov_100.921852__full-cat_2	3	6660	6962	1	E																	0									2	5	FALSE	F
NODE_6476_length_6936_cov_4.395146__full-cat_2	1	1	900	-1	E																	0									1	5	FALSE	F
NODE_6476_length_6936_cov_4.395146__full-cat_2	2	913	1875	-1	E																	0									1	3	FALSE	F
NODE_6476_length_6936_cov_4.395146__full-cat_2	3	1908	4112	-1	E																	0									1	3	FALSE	F
NODE_6476_length_6936_cov_4.395146__full-cat_2	4	4112	4378	-1	E																	0									2	3	FALSE	F
NODE_6476_length_6936_cov_4.395146__full-cat_2	5	4378	6933	-1	E																	0									1	5	FALSE	F
NODE_6524_length_6902_cov_145.885643__full-cat_2	1	1	4218	-1	E																	0									1	5	FALSE	F
NODE_6524_length_6902_cov_145.885643__full-cat_2	2	4167	4376	-1	E																	0									2	3	FALSE	F
NODE_6524_length_6902_cov_145.885643__full-cat_2	3	4417	4917	-1	E																	0									1	3	FALSE	F
NODE_6524_length_6902_cov_145.885643__full-cat_2	4	4901	6901	-1	E																	0									1	5	FALSE	F
NODE_6549_length_6891_cov_10.003072__full-cat_2	1	1	897	1	E																	0									2	5	FALSE	F
NODE_6549_length_6891_cov_10.003072__full-cat_2	2	908	2530	1	E																	0									2	4	FALSE	F
NODE_6549_length_6891_cov_10.003072__full-cat_2	3	2540	5683	1	E																	0									2	4	FALSE	F
NODE_6549_length_6891_cov_10.003072__full-cat_2	4	5686	6114	1	E																	0									2	4	FALSE	F
NODE_6549_length_6891_cov_10.003072__full-cat_2	5	6167	6427	-1	E																	0									2	4	FALSE	F
NODE_6693_length_6766_cov_5.243928__full-cat_2	1	1	4425	-1	E																	0									2	5	FALSE	F
NODE_6693_length_6766_cov_5.243928__full-cat_2	2	4431	5582	-1	E																	0									2	4	FALSE	F
NODE_6693_length_6766_cov_5.243928__full-cat_2	3	5596	6333	-1	E																	0									1	4	FALSE	F
NODE_6693_length_6766_cov_5.243928__full-cat_2	4	6379	6762	-1	E																	0									2	5	FALSE	F
NODE_6847_length_6646_cov_5.601881__full-cat_2	1	1	138	-1	E																	0									2	5	FALSE	F
NODE_6847_length_6646_cov_5.601881__full-cat_2	2	189	1307	-1	E																	0									2	4	FALSE	F
NODE_6847_length_6646_cov_5.601881__full-cat_2	3	1309	2079	-1	E																	0									2	4	FALSE	F
NODE_6847_length_6646_cov_5.601881__full-cat_2	4	2084	4624	-1	E																	0									1	4	FALSE	F
NODE_6847_length_6646_cov_5.601881__full-cat_2	5	4626	6644	-1	E																	0									2	5	FALSE	F
NODE_6865_length_6637_cov_4.718019__lt2gene-cat_1	1	1	6525	-1	E							YP_008241478.1	YP_008241478.1 structural protein [Cellulophaga phage phi38:1]	FALSE	0.216	188	3.45e-46			REFSEQ structural protein; Xu	Xu	0									0	5	FALSE	F
NODE_6984_length_6550_cov_3.785835__full-cat_2	1	1	900	1	E																	0									2	5	FALSE	F
NODE_6984_length_6550_cov_3.785835__full-cat_2	2	1035	1220	1	D													Helix-turn-helix domain [PF12728.7]				0									2	4	FALSE	F
NODE_6984_length_6550_cov_3.785835__full-cat_2	3	1223	1411	1	E																	0									2	4	FALSE	F
NODE_6984_length_6550_cov_3.785835__full-cat_2	4	1404	1715	1	E															REFSEQ hypothetical protein; Xu	Xu	0									1	4	FALSE	F
NODE_6984_length_6550_cov_3.785835__full-cat_2	5	1767	2297	1	C		rec:RHECIAT_CH0000487 hypothetical protein	FALSE	0.345	74	8.09e-13											0									1	3	FALSE	F
NODE_6984_length_6550_cov_3.785835__full-cat_2	6	2353	2955	1	C		har:HEAR3039 hypothetical protein	FALSE	0.329	68	1.58e-10											0									2	3	FALSE	F
NODE_6984_length_6550_cov_3.785835__full-cat_2	7	2957	3595	1	E																	0									2	3	FALSE	F
NODE_6984_length_6550_cov_3.785835__full-cat_2	8	3614	3853	1	C	K03670	swi:Swit_3488 mdoG; glucan biosynthesis protein G; K03670 periplasmic glucans biosynthesis protein	FALSE	0.662	80	1.26e-16											0									1	4	FALSE	F
NODE_6984_length_6550_cov_3.785835__full-cat_2	9	3846	4457	1	E																	0									2	4	FALSE	F
NODE_6984_length_6550_cov_3.785835__full-cat_2	10	4466	5053	1	C		sjp:SJA_C1-08850 hypothetical protein	FALSE	0.598	228	1.56e-65							SOS response associated peptidase (SRAP) [PF02586.14]		sp|O31916|YOQW_BACSU SOS response-associated protein YoqW; Xh	Xh	0									2	4	FALSE	F
NODE_6984_length_6550_cov_3.785835__full-cat_2	11	5540	6547	-1	E																	0									2	5	FALSE	F
NODE_7057_length_6487_cov_5.298974__full-cat_2	1	1	2454	-1	E																	0									2	5	FALSE	F
NODE_7057_length_6487_cov_5.298974__full-cat_2	2	2466	4151	-1	E																	0									2	4	FALSE	F
NODE_7057_length_6487_cov_5.298974__full-cat_2	3	4163	4882	-1	E																	0									1	4	FALSE	F
NODE_7057_length_6487_cov_5.298974__full-cat_2	4	4879	5376	-1	C		gca:Galf_2029 hypothetical protein	FALSE	0.341	65	5.35e-10	YP_008853927.1	YP_008853927.1 hypothetical protein [Ralstonia phage RSB3]	FALSE	0.465	81	6.92e-17			REFSEQ hypothetical protein; Xu	Xu	0									1	4	FALSE	F
NODE_7057_length_6487_cov_5.298974__full-cat_2	5	5431	6483	-1	E																	0									2	5	FALSE	F
NODE_7188_length_6390_cov_4.046725__full-cat_2	1	1	282	-1	E							YP_007517877.1	YP_007517877.1 hypothetical protein [Pelagibacter phage HTVC008M]	FALSE	0.583	101	4.01e-25					0									1	5	FALSE	F
NODE_7188_length_6390_cov_4.046725__full-cat_2	2	299	4156	-1	E																	0									1	4	FALSE	F
NODE_7188_length_6390_cov_4.046725__full-cat_2	3	4166	6253	-1	E																	0									2	4	FALSE	F
NODE_7188_length_6390_cov_4.046725__full-cat_2	4	6268	6384	-1	E																	0									2	5	FALSE	F
NODE_7200_length_6383_cov_5.922724__full-cat_2	1	1	429	-1	C		hne:HNE_2556 resolvase family site-specific recombinase	FALSE	0.815	239	2.03e-70	YP_001285832.1	YP_001285832.1 putative recombinase [Geobacillus virus E2]	FALSE	0.431	107	2.95e-26	Resolvase, N terminal domain [PF00239.21]				0										5	FALSE	F
NODE_7200_length_6383_cov_5.922724__full-cat_2	2	426	881	-1	C		mmr:Mmar10_0173 hypothetical protein	FALSE	0.521	114	4.45e-27							Protein of unknown function (DUF2924) [PF11149.8]				0										3	FALSE	F
NODE_7200_length_6383_cov_5.922724__full-cat_2	3	1144	2007	1	C		abs:AZOBR_200020 prophage LambdaMc01, DNA methyltransferase	FALSE	0.57	278	1.85e-81	YP_009221546.1	YP_009221546.1 DNA modification methylase [Verrucomicrobia phage P8625]	FALSE	0.474	178	1.59e-48	ParB-like nuclease domain [PF02195.18]		sp|P29538|MTH1_HAEPA Modification methylase HpaI; XhXp	Xh;Xp	0										3	FALSE	F
NODE_7200_length_6383_cov_5.922724__full-cat_2	4	1962	2489	1	C		sjp:SJA_C1-26090 putative DNA modification methylase	FALSE	0.661	212	1.41e-60	YP_009007728.1	YP_009007728.1 cytosine specific DNA methyltransferase [Staphylococcus phage vB_SepS_SEP9]	FALSE	0.339	77	1.57e-15	DNA methylase [PF01555.18]				0										3	FALSE	F
NODE_7200_length_6383_cov_5.922724__full-cat_2	5	2486	3250	1	C		oco:OCA4_c29310 hypothetical protein	FALSE	0.328	79	1.07e-13											0										4	FALSE	F
NODE_7200_length_6383_cov_5.922724__full-cat_2	6	3296	4462	-1	A	K05521	nar:Saro_0259 ADP-ribosyl-(dinitrogen reductase) hydrolase (EC:3.2.2.24); K05521 ADP-ribosylglycohydrolase [EC:3.2.-.-]	TRUE	0.638	487	8.15e-152	YP_009599845.1	YP_009599845.1 ADP-ribosylglycohydrolase [Serratia phage BF]	FALSE	0.425	211	3.92e-58	ADP-ribosylglycohydrolase [PF03747.14]; Cyclin-dependent kinase inhibitor 3 (CDKN3) [PF05706.12]; Dual specificity phosphatase, catalytic domain [PF00782.20]; Protein-tyrosine phosphatase [PF00102.27]		sp|A8GG79|TRI1_SERP5 ADP-ribosylarginine hydrolase Tri1; Xu	Xu	0										4	FALSE	F
NODE_7200_length_6383_cov_5.922724__full-cat_2	7	4565	4690	-1	C	K05521	nar:Saro_0259 ADP-ribosyl-(dinitrogen reductase) hydrolase (EC:3.2.2.24); K05521 ADP-ribosylglycohydrolase [EC:3.2.-.-]	FALSE	0.768	67	9.27e-13											0										4	FALSE	F
NODE_7200_length_6383_cov_5.922724__full-cat_2	8	5054	5644	-1	C		dec:DCF50_p2461 hypothetical protein	FALSE	0.318	70	2.27e-11											0										4	FALSE	F
NODE_7551_length_6156_cov_4.067366__full-cat_1	1	1	618	-1	E																	0									2	5	FALSE	F
NODE_7551_length_6156_cov_4.067366__full-cat_1	2	640	1026	-1	E																	0									1	4	FALSE	F
NODE_7551_length_6156_cov_4.067366__full-cat_1	3	1037	6154	-1	C		asl:Aeqsu_1520 hypothetical protein	FALSE	0.445	60	6.14e-06	YP_008241478.1	YP_008241478.1 structural protein [Cellulophaga phage phi38:1]	FALSE	0.329	191	2.58e-47	Fibronectin type III domain [PF00041.21]		REFSEQ structural protein; Xu	Xu	0									0	5	FALSE	F
NODE_7569_length_6147_cov_4.538083__full-cat_1	1	1	1005	-1	A	K06207	dsh:Dshi_0019 GTP-binding protein TypA; K06207 GTP-binding protein	TRUE	0.87	598	3.8e-191	YP_009052194.1	YP_009052194.1 putative translation elongation factor EF-1 alpha [Aureococcus anophagefferens virus]	FALSE	0.205	64	7.43e-10	Elongation factor Tu GTP binding domain [PF00009.27]; Elongation factor Tu domain 2 [PF03144.25]; 50S ribosome-binding GTPase [PF01926.23]		sp|P15170|ERF3A_HUMAN Eukaryotic peptide chain release factor GTP-binding subunit ERF3A; Xh	Xh	0									2	5	FALSE	F
NODE_7569_length_6147_cov_4.538083__full-cat_1	2	1131	2219	-1	A		sil:SPO1636 SREBP protease	TRUE	0.598	418	2.87e-128							Peptidase family M50 [PF02163.22]				0	MER0190963	M50B	MER0190963 - MjS2P-type peptidase (Sagittula stellata) [M50.006]#M50B#{peptidase unit: 16-288}~source ZP_01745332~	FALSE	0.598	321	7.04e-96		2	4	FALSE	MF
NODE_7569_length_6147_cov_4.538083__full-cat_1	3	2296	2817	-1	C	K03111	eli:ELI_00195 single-strand binding protein; K03111 single-strand DNA-binding protein	FALSE	0.661	233	7.08e-68	YP_009593515.1	YP_009593515.1 single-stranded DNA-binding-like protein [Paracoccus phage Shpa]	FALSE	0.845	209	5.28e-61	Single-strand binding protein family [PF00436.25]; Proline-rich [PF15240.6]		sp|P9WGD4|SSB_MYCTO Single-stranded DNA-binding protein; Xu	Xu	0									1	4	FALSE	F
NODE_7569_length_6147_cov_4.538083__full-cat_1	4	3029	3622	1	C		pga:PGA1_c14130 transglycosylase	FALSE	0.672	264	3.18e-78	NP_046584.1	NP_046584.1 putative transglycosylase [Bacillus virus SPbeta]	FALSE	0.432	137	7.91e-36	Transglycosylase SLT domain [PF01464.20]	GH23 lysozyme type G (EC 3.2.1.17); peptidoglycan lyase (EC 4.2.2.n1) also known in the literature as peptidoglycan lytic transglycosylase; chitinase (EC 3.2.1.14) [GH23]			0	MER0025057	M23B	MER0025057 - yomI g.p. ({Bacillus subtilis}) () [M23.A04]#M23B#{peptidase unit: 1489-1687}~source NP_046584~	FALSE	0.683	70	3.02e-12		0	3	FALSE	APF
NODE_7569_length_6147_cov_4.538083__full-cat_1	5	3619	3975	-1	C	K07145	mpt:Mpe_A3555 hypothetical protein; K07145	FALSE	0.594	134	1.51e-34							Domain of unknown function (DUF4188) [PF13826.6]				0									2	2	FALSE	F
NODE_7569_length_6147_cov_4.538083__full-cat_1	6	4022	4582	-1	C		sil:SPO0680 glyoxalase	FALSE	0.918	342	1.99e-105							Glyoxalase/Bleomycin resistance protein/Dioxygenase superfamily [PF00903.25]; Glyoxalase/Bleomycin resistance protein/Dioxygenase superfamily [PF13669.6]				0									2	2	FALSE	F
NODE_7569_length_6147_cov_4.538083__full-cat_1	7	4701	6143	-1	A	K02031,K02032	rde:RD1_2578 ABC transporter ATP-binding protein; K02031 peptide/nickel transport system ATP-binding protein; K02032 peptide/nickel transport system ATP-binding protein	TRUE	0.847	837	3.98e-271	YP_009015548.1	YP_009015548.1 gp245 [Bacillus virus G]	FALSE	0.28	79	2.23e-14	ABC transporter [PF00005.27]; Oligopeptide/dipeptide transporter, C-terminal region [PF08352.12]				0									1	5	FALSE	MF
NODE_7819_length_6000_cov_6.018671__full-cat_2	1	1	411	-1	C	K01619	hiz:R2866_1284 deoC; Deoxyribose-phosphate aldolase (EC:4.1.2.4); K01619 deoxyribose-phosphate aldolase [EC:4.1.2.4]	FALSE	0.578	149	1.51e-39							DeoC/LacD family aldolase [PF01791.9]				0									2	5	FALSE	MKF
NODE_7819_length_6000_cov_6.018671__full-cat_2	2	625	1491	-1	C	K09973	sli:Slin_6313 GumN family protein; K09973 hypothetical protein	FALSE	0.451	214	2.24e-59							TraB family [PF01963.17]				0	MER0307088	M96	MER0307088 - family M96 unassigned peptidases () [M96.UPW]#M96#{peptidase unit: 21-282}~source WP_008271652~	FALSE	0.632	327	2.19e-99		2	4	FALSE	MF
NODE_7819_length_6000_cov_6.018671__full-cat_2	3	1883	4492	-1	A	K03695	lan:Lacal_2936 ATP-dependent chaperone ClpB; K03695 ATP-dependent Clp protease ATP-binding subunit ClpB	TRUE	0.822	1470	0	YP_009611957.1	YP_009611957.1 ATP-dependent Clp protease ATP-binding subunit [Agrobacterium phage Atu_ph07]	TRUE	0.328	431	9.67e-127	AAA domain (Cdc48 subfamily) [PF07724.14]; AAA lid domain [PF17871.1]; C-terminal, D2-small domain, of ClpB protein [PF10431.9]; AAA domain (dynein-related subfamily) [PF07728.14]; ATPase family associated with various cellular activities (AAA) [PF00004.29]; Torsin [PF06309.11]; Sigma-54 interaction domain [PF00158.26]; Clp amino terminal domain, pathogenicity island component [PF02861.20]		sp|P0ABH9|CLPA_ECOLI ATP-dependent Clp protease ATP-binding subunit ClpA; Xh	Xh	0									1	4	FALSE	F
NODE_7819_length_6000_cov_6.018671__full-cat_2	4	4796	5998	1	A		ptq:P700755_003492 glucan endo-1,3-beta-D-glucosidase (laminarinase)	TRUE	0.587	432	1.27e-132	YP_009701747.1	YP_009701747.1 (1-3)-beta-glucanase [Paramecium bursaria Chlorella virus CVA-1]	FALSE	0.249	68	6.85e-11	Glycosyl hydrolases family 16 [PF00722.21]; Beta-glucan synthesis-associated protein (SKN1) [PF03935.15]	GH16 xyloglucan:xyloglucosyltransferase (EC 2.4.1.207); keratan-sulfate endo-1,4-beta-galactosidase (EC 3.2.1.103); endo-1,3-beta-glucanase / laminarinase (EC 3.2.1.39); endo-1,3(4)-beta-glucanase (EC 3.2.1.6); licheninase (EC 3.2.1.73); beta-agarase (EC 3.2.1.81); kappa;-carrageenase (EC 3.2.1.83); xyloglucanase (EC 3.2.1.151); endo-beta-1,3-galactanase (EC 3.2.1.181); [retaining] beta-porphyran…	REFSEQ hypothetical protein; Xu	Xu	0									2	5	FALSE	MKEF
NODE_7914_length_5941_cov_7.943085__full-cat_2	1	1	3849	-1	E																	0									2	5	FALSE	F
NODE_7914_length_5941_cov_7.943085__full-cat_2	2	3853	4125	-1	D													Base plate wedge protein 53 [PF11246.8]				0									1	4	FALSE	F
NODE_7914_length_5941_cov_7.943085__full-cat_2	3	4125	5918	-1	E																	0									1	5	FALSE	F
NODE_7963_length_5904_cov_6.212857__full-cat_2	1	1	66	-1	E																	0									2	5	FALSE	F
NODE_7963_length_5904_cov_6.212857__full-cat_2	2	66	1421	-1	E							YP_007006862.1	YP_007006862.1 gp255 [Sphingomonas phage PAU]	FALSE	0.232	97	5.15e-20					0									1	4	FALSE	F
NODE_7963_length_5904_cov_6.212857__full-cat_2	3	1452	2936	-1	E																	0									1	3	FALSE	F
NODE_7963_length_5904_cov_6.212857__full-cat_2	4	2940	3491	-1	E																	0									1	4	FALSE	F
NODE_7963_length_5904_cov_6.212857__full-cat_2	5	3506	5314	-1	E							YP_007006876.1	YP_007006876.1 gp269 [Sphingomonas phage PAU]	FALSE	0.287	195	1.06e-50					0									2	4	FALSE	F
NODE_7963_length_5904_cov_6.212857__full-cat_2	6	5341	5901	-1	E																	0									2	5	FALSE	F
NODE_7976_length_5896_cov_3.627803__full-cat_1	1	1	114	1	E																	0										5	FALSE	F
NODE_7976_length_5896_cov_3.627803__full-cat_1	2	119	5716	1	E																	0										4	FALSE	F
NODE_7996_length_5883_cov_6.886410__full-cat_2	1	1	3456	-1	E																	0									1	5	FALSE	F
NODE_7996_length_5883_cov_6.886410__full-cat_2	2	3472	5847	-1	E																	0									1	5	FALSE	F
NODE_8067_length_5833_cov_8.425926__full-cat_2	1	1	1110	1	E																	0									1	5	FALSE	F
NODE_8067_length_5833_cov_8.425926__full-cat_2	2	1116	5777	1	A		dru:Desru_1103 hypothetical protein	TRUE	0.298	368	6.45e-100	YP_007517718.1	YP_007517718.1 hypothetical protein [Pelagibacter phage HTVC010P]	FALSE	0.411	327	7.35e-89	Large polyvalent protein associated domain 38 [PF18857.1]; Zeta toxin [PF06414.12]				0									1	5	FALSE	F
NODE_8082_length_5824_cov_17.075923__full-cat_2	1	3	1238	1	C	K06919	wch:wcw_0673 hypothetical protein; K06919 putative DNA primase/helicase	FALSE	0.289	113	1.19e-23	YP_009616389.1	YP_009616389.1 DNA primase/helicase [Mycobacterium phage Godines]	FALSE	0.213	60	1.55e-08	AAA domain [PF13481.6]				0										5	FALSE	F
NODE_8082_length_5824_cov_17.075923__full-cat_2	2	1222	1728	1	D													Terminase small subunit [PF03592.16]				0									1	4	FALSE	F
NODE_8082_length_5824_cov_17.075923__full-cat_2	3	1694	1954	1	E																	0									2	3	FALSE	F
NODE_8082_length_5824_cov_17.075923__full-cat_2	4	1947	2363	1	E																	0									2	3	FALSE	F
NODE_8082_length_5824_cov_17.075923__full-cat_2	5	2845	3891	1	C		mec:Q7C_1439 site-specific recombinase, phage integrase family	FALSE	0.324	175	7.94e-45	YP_009007086.1	YP_009007086.1 Site-specific DNA recombinase [Pseudomonas phage vB_PaeP_Tr60_Ab31]	FALSE	0.271	131	8.74e-32			sp|O10330|VLF1_NPVOP Very late expression factor 1; Xr	Xr	0									1	3	FALSE	VF
NODE_8082_length_5824_cov_17.075923__full-cat_2	6	4376	4624	1	E																	0									1	4	FALSE	F
NODE_8082_length_5824_cov_17.075923__full-cat_2	7	4624	4812	1	E																	0									2	4	FALSE	F
NODE_8082_length_5824_cov_17.075923__full-cat_2	8	4799	5170	1	E																	0									2	4	FALSE	F
NODE_8082_length_5824_cov_17.075923__full-cat_2	9	5170	7017	1	C	K06919	wch:wcw_0673 hypothetical protein; K06919 putative DNA primase/helicase	FALSE	0.289	113	7.36e-23	YP_009616389.1	YP_009616389.1 DNA primase/helicase [Mycobacterium phage Godines]	FALSE	0.213	60	3.07e-08	AAA domain [PF13481.6]				0									2	5	FALSE	F
NODE_8083_length_5824_cov_8.918183__lt2gene-cat_1	1	3	5822	-1	E							YP_008241478.1	YP_008241478.1 structural protein [Cellulophaga phage phi38:1]	FALSE	0.344	176	1.1e-42			REFSEQ structural protein; Xu	Xu	0									0	5	FALSE	F
NODE_8342_length_5698_cov_78.568669__full-cat_2	1	1	84	1	E																	0									2	5	FALSE	F
NODE_8342_length_5698_cov_78.568669__full-cat_2	2	86	1204	1	E																	0									1	4	FALSE	F
NODE_8342_length_5698_cov_78.568669__full-cat_2	3	1206	5696	1	E							YP_008242152.1	YP_008242152.1 hypothetical protein Phi13:2_gp127 [Cellulophaga phage phi13:2]	FALSE	0.158	112	1.67e-23					0									1	5	FALSE	F
NODE_8420_length_5668_cov_19.946731__full-cat_2	1	1	1068	1	E																	0									2	5	FALSE	F
NODE_8420_length_5668_cov_19.946731__full-cat_2	2	1080	5618	1	E							YP_008241316.1	YP_008241316.1 structural protein [Cellulophaga phage phi18:3]	FALSE	0.157	79	2.4e-13					0									1	5	FALSE	F
NODE_8430_length_5664_cov_13.153325__full-cat_2	1	151	3492	-1	E																	0									2	4	FALSE	F
NODE_8430_length_5664_cov_13.153325__full-cat_2	2	3553	5025	-1	E																	0									2	4	FALSE	F
NODE_8430_length_5664_cov_13.153325__full-cat_2	3	5097	5342	-1	E																	0									2	4	FALSE	F
NODE_8430_length_5664_cov_13.153325__full-cat_2	4	5321	5662	-1	E																	0									1	5	FALSE	F
NODE_8734_length_5515_cov_7.022711__lt2gene-cat_1	1	3	5513	1	E							YP_008241478.1	YP_008241478.1 structural protein [Cellulophaga phage phi38:1]	FALSE	0.285	135	2.63e-30					0									0	5	FALSE	F
NODE_8848_length_5457_cov_5.236394__full-cat_2	1	1	2094	1	E																	0									1	5	FALSE	F
NODE_8848_length_5457_cov_5.236394__full-cat_2	2	2094	5444	1	E																	0									1	5	FALSE	F
NODE_8867_length_5447_cov_61.927485__full-cat_2	1	1	333	1	E							YP_004508547.1	YP_004508547.1 hypothetical cyanophage protein [Synechococcus phage S-CRM01]	FALSE	0.372	70	3.23e-14					0									1	5	FALSE	F
NODE_8867_length_5447_cov_61.927485__full-cat_2	2	453	1193	1	E																	0									2	3	FALSE	F
NODE_8867_length_5447_cov_61.927485__full-cat_2	3	1368	1565	-1	E																	0									2	3	FALSE	F
NODE_8867_length_5447_cov_61.927485__full-cat_2	4	2147	2347	1	E																	0										3	FALSE	F
NODE_8867_length_5447_cov_61.927485__full-cat_2	5	2371	3783	1	C		apa:APP7_0456 tyrosine recombinase xerD	FALSE	0.232	66	9.39e-09							Phage integrase family [PF00589.22]; Arm DNA-binding domain [PF13356.6]		sp|O10330|VLF1_NPVOP Very late expression factor 1; Xr	Xr	0									1	4	FALSE	VF
NODE_8867_length_5447_cov_61.927485__full-cat_2	6	3826	4419	1	E																	0									2	4	FALSE	F
NODE_8867_length_5447_cov_61.927485__full-cat_2	7	4522	4707	1	E																	0									2	4	FALSE	F
NODE_8867_length_5447_cov_61.927485__full-cat_2	8	4716	5090	1	E																	0									2	4	FALSE	F
NODE_8867_length_5447_cov_61.927485__full-cat_2	9	5087	5239	1	E																	0									2	4	FALSE	F
NODE_8867_length_5447_cov_61.927485__full-cat_2	10	5236	5445	1	E																	0									2	5	FALSE	F
NODE_8905_length_5432_cov_45.512182__full-cat_2	1	1	3798	-1	E							YP_008320284.1	YP_008320284.1 hypothetical protein phage1322_22 [Puniceispirillum phage HMO-2011]	TRUE	0.3	442	2.21e-126					0									1	5	FALSE	F
NODE_8905_length_5432_cov_45.512182__full-cat_2	2	3798	5036	-1	E																	0									2	3	FALSE	F
NODE_8905_length_5432_cov_45.512182__full-cat_2	3	5036	5323	-1	E							YP_008320286.1	YP_008320286.1 hypothetical protein phage1322_24 [Puniceispirillum phage HMO-2011]	FALSE	0.382	64	2.75e-12					0										3	FALSE	F
NODE_9041_length_5371_cov_2.636945__full-cat_2	1	1	399	1	C		eli:ELI_11345 membrane carboxypeptidase	FALSE	0.604	121	6.89e-30											0									2	5	FALSE	F
NODE_9041_length_5371_cov_2.636945__full-cat_2	2	476	1999	-1	A		npp:PP1Y_AT33493 peptidase S1C, Do	TRUE	0.654	660	2.2e-209							Trypsin-like peptidase domain [PF13365.6]; PDZ domain [PF13180.6]; PDZ domain [PF17820.1]		REFSEQ putative peptidase/serine protease; Xu	Xu	0	MER0244213	S01C	MER0244213 - subfamily S1C unassigned peptidases (Erythrobacter sp. SD-21) [S01.UPC]#S01C#{peptidase unit: 109-471}~source ZP_01864691~	TRUE	0.706	510	1.04e-158		1	4	FALSE	PF
NODE_9041_length_5371_cov_2.636945__full-cat_2	3	2165	3019	-1	A	K04087	eli:ELI_11335 hypothetical protein; K04087 membrane protease subunit HflC [EC:3.4.-.-]	TRUE	0.68	381	3.6e-117							SPFH domain / Band 7 family [PF01145.25]		sp|Q9FHM7|HIR4_ARATH Hypersensitive-induced response protein 4; Xh	Xh	0	MER0798613	I87	MER0798613 - family I87 unassigned peptidase inhibitors (Porphyrobacter mercurialis) [I87.UPW]#I87#{inhibitor unit: 18-275}~source A0A0B2C296~	TRUE	0.721	377	1.11e-116		2	4	FALSE	MKPF
NODE_9041_length_5371_cov_2.636945__full-cat_2	4	3082	4290	-1	A	K04088	eli:ELI_11330 integral membrane proteinase; K04088 membrane protease subunit HflK [EC:3.4.-.-]	TRUE	0.57	348	1.97e-103							SPFH domain / Band 7 family [PF01145.25]		sp|Q9FHM7|HIR4_ARATH Hypersensitive-induced response protein 4; Xh	Xh	0	MER0804661	I87	MER0804661 - family I87 unassigned peptidase inhibitors (Erythrobacter litoralis) [I87.UPW]#I87#{inhibitor unit: 104-304}~source Q2N7I3~	FALSE	0.656	261	1.35e-74		2	4	FALSE	MKPF
NODE_9041_length_5371_cov_2.636945__full-cat_2	5	4383	5348	1	A	K03593	sch:Sphch_3126 ParA/MinD ATPase-like protein; K03593 ATP-binding protein involved in chromosome partitioning	TRUE	0.614	381	2.48e-116							NUBPL iron-transfer P-loop NTPase [PF10609.9]; AAA domain [PF13614.6]; ATPase MipZ [PF09140.11]; CobQ/CobB/MinD/ParA nucleotide binding domain [PF01656.23]; Cellulose biosynthesis protein BcsQ [PF06564.12]; VirC1 protein [PF07015.11]; 4Fe-4S iron sulfur cluster binding proteins, NifH/frxC family [PF00142.18]; Anion-transporting ATPase [PF02374.15]		sp|P07620|PARA_ECOLX Plasmid partition protein A; Xh	Xh	0									2	5	FALSE	F
NODE_9088_length_5351_cov_5.372356__full-cat_2	1	1	3456	-1	E																	0									1	5	FALSE	F
NODE_9088_length_5351_cov_5.372356__full-cat_2	2	3398	4075	-1	E																	0									2	4	FALSE	F
NODE_9088_length_5351_cov_5.372356__full-cat_2	3	4230	5351	-1	E																	0									2	5	FALSE	F
NODE_9367_length_5225_cov_17.875242__full-cat_1	1	1	4359	-1	C		amc:MADE_1014555 hypothetical protein	FALSE	0.162	66	8.27e-08	YP_006382509.1	YP_006382509.1 phage particle protein [Pseudomonas phage tf]	FALSE	0.243	66	1.99e-09					0									0	5	FALSE	F
NODE_9367_length_5225_cov_17.875242__full-cat_1	2	4377	5186	-1	E																	0									2	5	FALSE	F
NODE_9379_length_5221_cov_11.201123__full-cat_2	1	1	567	-1	E																	0									2	5	FALSE	F
NODE_9379_length_5221_cov_11.201123__full-cat_2	2	1180	1527	-1	E																	0									1	4	FALSE	F
NODE_9379_length_5221_cov_11.201123__full-cat_2	3	1524	1949	-1	E																	0									2	3	FALSE	F
NODE_9379_length_5221_cov_11.201123__full-cat_2	4	1949	2317	-1	E																	0									2	3	FALSE	F
NODE_9379_length_5221_cov_11.201123__full-cat_2	5	2871	3059	1	E																	0									1	3	FALSE	F
NODE_9379_length_5221_cov_11.201123__full-cat_2	6	3070	3546	1	C		synp:Syn7502_02829 hypothetical protein	FALSE	0.486	83	4.75e-16	YP_007673530.1	YP_007673530.1 hypothetical protein VPHG_00044 [Vibrio phage 11895-B1]	FALSE	0.284	73	2.82e-14					0									1	4	FALSE	F
NODE_9379_length_5221_cov_11.201123__full-cat_2	7	3546	3704	1	E																	0									2	4	FALSE	F
NODE_9379_length_5221_cov_11.201123__full-cat_2	8	3708	3902	1	E																	0									2	4	FALSE	F
NODE_9379_length_5221_cov_11.201123__full-cat_2	9	3965	4168	1	E																	0									2	4	FALSE	F
NODE_9379_length_5221_cov_11.201123__full-cat_2	10	4184	4372	1	E																	0									2	4	FALSE	F
NODE_9379_length_5221_cov_11.201123__full-cat_2	11	4386	4574	1	E																	0									2	4	FALSE	F
NODE_9379_length_5221_cov_11.201123__full-cat_2	12	4574	4846	1	E																	0									2	4	FALSE	F
NODE_9379_length_5221_cov_11.201123__full-cat_2	13	4818	5012	1	E																	0									2	4	FALSE	F
NODE_9379_length_5221_cov_11.201123__full-cat_2	14	5012	5182	1	E																	0									2	5	FALSE	F
NODE_9406_length_5211_cov_3.386928__full-cat_1	1	1	114	-1	E																	0									2	5	FALSE	F
NODE_9406_length_5211_cov_3.386928__full-cat_1	2	418	1680	1	A		sphm:G432_12380 phage integrase	TRUE	0.592	478	6.05e-148	YP_007001952.1	YP_007001952.1 putative integrase [Escherichia phage TL-2011b]	FALSE	0.246	132	1.6e-31	Phage integrase family [PF00589.22]; Arm DNA-binding domain [PF13356.6]		sp|O10330|VLF1_NPVOP Very late expression factor 1; Xr	Xr	0									1	4	FALSE	VF
NODE_9406_length_5211_cov_3.386928__full-cat_1	3	1662	1877	-1	E																	0									2	2	FALSE	F
NODE_9406_length_5211_cov_3.386928__full-cat_1	4	1896	2561	-1	C		sphm:G432_12385 lytic transglycosylase catalytic subunit subunit	FALSE	0.568	190	6.21e-52	YP_009223750.1	YP_009223750.1 putative tape measure protein [Geobacillus virus E3]	FALSE	0.55	124	5.75e-31	Transglycosylase SLT domain [PF01464.20]	GH23 lysozyme type G (EC 3.2.1.17); peptidoglycan lyase (EC 4.2.2.n1) also known in the literature as peptidoglycan lytic transglycosylase; chitinase (EC 3.2.1.14) [GH23]			0	MER0025057	M23B	MER0025057 - yomI g.p. ({Bacillus subtilis}) () [M23.A04]#M23B#{peptidase unit: 1489-1687}~source NP_046584~	FALSE	0.558	65	2e-10		0	3	FALSE	APF
NODE_9406_length_5211_cov_3.386928__full-cat_1	5	2698	3621	1	C		eli:ELI_04015 hypothetical protein	FALSE	0.605	336	5.05e-101	YP_009222801.1	YP_009222801.1 DNA primase [Pseudomonas phage PS-1]	FALSE	0.291	66	1.36e-10	Toprim domain [PF13362.6]; CHC2 zinc finger [PF01807.20]		REFSEQ DNA primase; Xu	Xu	0									1	4	FALSE	F
NODE_9406_length_5211_cov_3.386928__full-cat_1	6	3720	5210	1	A		eli:ELI_00640 methylase/helicase	TRUE	0.487	424	4.39e-128							P-loop containing NTP hydrolase pore-1 [PF13872.6]; N-6 DNA Methylase [PF02384.16]; Methyltransferase small domain [PF05175.14]				0									2	5	FALSE	F
NODE_943_length_31852_cov_9.833915__full-cat_2	1	1	249	1	E																	0									2	5	FALSE	F
NODE_943_length_31852_cov_9.833915__full-cat_2	2	219	1796	-1	E																	0									2	4	FALSE	F
NODE_943_length_31852_cov_9.833915__full-cat_2	3	2097	2783	-1	E																	0									2	4	FALSE	F
NODE_943_length_31852_cov_9.833915__full-cat_2	4	3160	4245	-1	E																	0									2	4	FALSE	F
NODE_943_length_31852_cov_9.833915__full-cat_2	5	4504	4737	-1	E																	0									2	4	FALSE	F
NODE_943_length_31852_cov_9.833915__full-cat_2	6	4761	5090	-1	E																	0									2	4	FALSE	F
NODE_943_length_31852_cov_9.833915__full-cat_2	7	5266	6795	-1	E																	0									2	4	FALSE
NODE_943_length_31852_cov_9.833915__full-cat_2	8	6860	7129	-1	E															sp|Q5UP30|YL851_MIMIV Uncharacterized protein L851; Xs	Xs	0									1	4	FALSE	V
NODE_943_length_31852_cov_9.833915__full-cat_2	9	7137	7484	-1	E							YP_009173453.1	YP_009173453.1 hypothetical protein ceV_198 [Chrysochromulina ericina virus]	FALSE	0.435	98	9.84e-24			REFSEQ hypothetical protein; Xu	Xu	0									1	3	FALSE
NODE_943_length_31852_cov_9.833915__full-cat_2	10	7709	9958	-1	E																	0									2	3	FALSE
NODE_943_length_31852_cov_9.833915__full-cat_2	11	9999	10448	-1	E																	0									2	3	FALSE
NODE_943_length_31852_cov_9.833915__full-cat_2	12	10839	10991	1	E																	0									2	3	FALSE
NODE_943_length_31852_cov_9.833915__full-cat_2	13	10997	12490	-1	E																	0									2	3	FALSE
NODE_943_length_31852_cov_9.833915__full-cat_2	14	12590	12817	1	E																	0									2	3	FALSE
NODE_943_length_31852_cov_9.833915__full-cat_2	15	12828	14414	-1	E																	0									2	3	FALSE
NODE_943_length_31852_cov_9.833915__full-cat_2	16	14510	14917	1	E																	0									2	3	FALSE
NODE_943_length_31852_cov_9.833915__full-cat_2	17	14987	15337	-1	E																	0									2	3	FALSE
NODE_943_length_31852_cov_9.833915__full-cat_2	18	15450	16139	-1	E																	0									2	3	FALSE
NODE_943_length_31852_cov_9.833915__full-cat_2	19	16199	16612	-1	E																	0									2	3	FALSE
NODE_943_length_31852_cov_9.833915__full-cat_2	20	16630	16971	-1	E																	0									2	3	FALSE
NODE_943_length_31852_cov_9.833915__full-cat_2	21	17014	20394	1	E																	0									1	3	FALSE
NODE_943_length_31852_cov_9.833915__full-cat_2	22	20432	20938	1	E																	0									2	3	FALSE
NODE_943_length_31852_cov_9.833915__full-cat_2	23	21000	23189	-1	E																	0									2	3	FALSE
NODE_943_length_31852_cov_9.833915__full-cat_2	24	23255	23782	1	E																	0									1	3	FALSE
NODE_943_length_31852_cov_9.833915__full-cat_2	25	23814	24707	1	E															sp|P0DSZ9|A32_VARV Protein A32; Xh	Xh	0									1	3	FALSE
NODE_943_length_31852_cov_9.833915__full-cat_2	26	24708	25034	1	E																	0									2	3	FALSE
NODE_943_length_31852_cov_9.833915__full-cat_2	27	25080	27953	1	E																	0									2	3	FALSE	F
NODE_943_length_31852_cov_9.833915__full-cat_2	28	28008	28304	1	E																	0									2	3	FALSE	F
NODE_943_length_31852_cov_9.833915__full-cat_2	29	28484	31657	1	C	K06919	tcx:Tcr_0668 hypothetical protein; K06919 putative DNA primase/helicase	FALSE	0.275	64	2.22e-07	YP_009601817.1	YP_009601817.1 primase [Pseudomonas phage LKO4]	FALSE	0.21	77	6e-13					0									1	5	FALSE	F
NODE_9862_length_5025_cov_2.579879__full-cat_2	1	1	486	1	C		asl:Aeqsu_2948 hypothetical protein	FALSE	0.77	255	1.19e-75							Rhomboid family [PF01694.22]				0	MER1077942	S54	MER1077942 - family S54 unassigned peptidases (Vitellibacter vladivostokensis) [S54.UPW]#S54#{peptidase unit: 23-186}~source A0A0F0A114~	FALSE	0.798	216	1.64e-63		2	5	FALSE	PF
NODE_9862_length_5025_cov_2.579879__full-cat_2	2	596	1708	-1	A		asl:Aeqsu_2946 peroxiredoxin	TRUE	0.575	409	2.96e-125							AhpC/TSA family [PF00578.21]; Redoxin [PF08534.10]; Thioredoxin-like [PF13905.6]; Domain of unknown function (DUF4369) [PF14289.6]; Thioredoxin [PF00085.20]; Thioredoxin-like domain [PF13098.6]; F plasmid transfer operon protein [PF13728.6]				0									2	4	FALSE	F
NODE_9862_length_5025_cov_2.579879__full-cat_2	3	1827	3326	1	A		asl:Aeqsu_2945 hypothetical protein	TRUE	0.546	504	1.61e-155											0									2	4	FALSE	F
NODE_9862_length_5025_cov_2.579879__full-cat_2	4	3340	4059	1	C		asl:Aeqsu_2945 hypothetical protein	FALSE	0.741	297	6.61e-89											0									2	4	FALSE	F
NODE_9862_length_5025_cov_2.579879__full-cat_2	5	4088	5023	-1	A		asl:Aeqsu_2944 putative domain HDIG-containing protein	TRUE	0.729	431	7.06e-134											0									1	5	FALSE	F

## Sheet: Contigs < 5kb - Manual inspecti
seqname	dsDNAphage	NCLDV	RNA	ssDNA	lavidaviridae	max_score	max_score_group	length	hallmark gene #	viral gene %	cellular gene %	Manual inspection notes		Counts
NODE_35112_length_1831_cov_442.146959__full	0.7	0.3	0.3	1	0.8	1	ssDNA	1830	0	66.7	0	Likely not viral	Likely viral	54
NODE_40427_length_1652_cov_2.685034__full	0.4	0.9	0.3	0.1	0.7	0.9	NCLDV	1648	0	33.3	0	Likely not viral	Unsure	4
NODE_38258_length_1720_cov_19.139339__full	0.3	0.7	0.3	0.5	0.4	0.7	NCLDV	1712	0	50	0	Likely viral	Likely not viral	2
NODE_11992_length_4297_cov_12.143564__full	1	1	0.2	0.8	1	1	dsDNAphage	4242	1	75	0	Likely viral
NODE_26521_length_2264_cov_29.884563__full	0.9	0.7	0.8	0.9	0.9	0.9	ssDNA	2124	0	33.3	0	Likely viral
NODE_20782_length_2756_cov_3.161792__full	0.8	0.2	0.4	0.8	0.7	0.8	ssDNA	2755	0	66.7	0	Likely viral
NODE_41657_length_1615_cov_2.005128__full	0.9	0.5	0.3	1	0.6	1	ssDNA	1614	0	100	0	Likely viral
NODE_26416_length_2272_cov_11.224177__lt2gene	nan	nan	nan	nan	nan	nan	dsDNAphage	2272	1	100	0	Likely viral
NODE_19494_length_2902_cov_9.408500__full	0.8	0.7	0.5	0.9	0.7	0.9	ssDNA	2900	0	33.3	0	Likely viral
NODE_43104_length_1573_cov_8.111989__full	0.9	0.8	0.4	1	0.7	1	ssDNA	1569	0	100	0	Likely viral
NODE_35848_length_1804_cov_7.648370__lt2gene	nan	nan	nan	nan	nan	nan	dsDNAphage	1804	1	100	0	Likely viral
NODE_35341_length_1823_cov_3.949661__lt2gene	nan	nan	nan	nan	nan	nan	dsDNAphage	1823	2	100	0	Likely viral
NODE_10593_length_4749_cov_2.648274__full	0.5	0.6	0	0.1	0.1	0.6	NCLDV	4746	0	100	0	Likely viral
NODE_36452_length_1782_cov_17.044007__full	1	0.9	0.4	1	0.6	1	ssDNA	1779	0	100	0	Likely viral
NODE_36882_length_1767_cov_96.320093__full	1	0.7	0.3	1	0.6	1	dsDNAphage	1744	2	100	0	Likely viral
NODE_25549_length_2334_cov_11.204476__full	0.9	0.4	0.4	1	0.3	1	ssDNA	2282	0	50	0	Likely viral
NODE_44017_length_1549_cov_13.160643__lt2gene	nan	nan	nan	nan	nan	nan	dsDNAphage	1549	1	100	0	Likely viral
NODE_27061_length_2229_cov_4.014719__lt2gene	nan	nan	nan	nan	nan	nan	dsDNAphage	2229	1	100	0	Likely viral
NODE_19132_length_2952_cov_2.426648__full	1	0.8	0.4	1	0.9	1	dsDNAphage	2951	1	100	0	Likely viral
NODE_26949_length_2237_cov_24.763978__full	0.5	0.1	0	0.1	0	0.5	dsDNAphage	2235	0	50	25	Likely viral
NODE_31137_length_2003_cov_62.968686__full	1	0.9	0.3	0.9	0.6	1	dsDNAphage	2002	2	100	0	Likely viral
NODE_25294_length_2352_cov_2.222029__full	0.6	0.4	0.8	1	1	1	ssDNA	2349	0	33.3	0	Likely viral
NODE_24283_length_2428_cov_2.100716__full	0.7	1	0.8	0.8	1	1	lavidaviridae	2427	0	33.3	0	Likely viral
NODE_29690_length_2078_cov_10.799802__full	0.9	1	0.1	0.7	1	1	NCLDV	2074	0	100	0	Likely viral
NODE_26759_length_2250_cov_8.978588__full	0.3	0.8	0.8	0.9	0.9	0.9	lavidaviridae	1991	0	50	0	Likely viral
NODE_27514_length_2200_cov_7.323077__lt2gene	nan	nan	nan	nan	nan	nan	dsDNAphage	2200	2	100	0	Likely viral
NODE_27571_length_2196_cov_5.817375__full	0.5	0.8	0.4	0.8	0.6	0.8	NCLDV	2118	0	33.3	0	Likely viral
NODE_23913_length_2459_cov_4.738769__full	0.8	1	0.4	0.9	1	1	lavidaviridae	2458	0	66.7	0	Likely viral
NODE_22566_length_2577_cov_2.390167__full	0.6	0.6	0.1	0.9	0.7	0.9	ssDNA	2291	0	66.7	0	Likely viral
NODE_22102_length_2622_cov_7.276977__full	0.7	0.9	0.2	0.4	0.3	0.9	NCLDV	2621	0	66.7	0	Likely viral
NODE_14842_length_3607_cov_5.516610__full	1	0.6	0.4	1	0.9	1	dsDNAphage	3569	1	66.7	0	Likely viral
NODE_39209_length_1690_cov_5.335168__lt2gene	nan	nan	nan	nan	nan	nan	dsDNAphage	1690	2	100	0	Likely viral
NODE_23097_length_2529_cov_62.329426__full	1	0.7	0.3	0.9	0.9	1	dsDNAphage	2491	2	66.7	0	Likely viral
NODE_27367_length_2209_cov_2.325905__full	0.7	0.4	0.7	0.7	0.6	0.7	ssDNA	1559	0	50	0	Likely viral
NODE_38819_length_1702_cov_16.859745__full	0.9	0.9	0.2	0.9	0.9	0.9	lavidaviridae	1700	0	42.9	0	Likely viral
NODE_34140_length_1870_cov_2.565289__full	1	0.1	0.5	0.9	0.8	1	dsDNAphage	1798	0	14.3	0	Likely viral
NODE_35164_length_1830_cov_3.848451__lt2gene	nan	nan	nan	nan	nan	nan	dsDNAphage	1830	1	100	0	Likely viral
NODE_25722_length_2322_cov_14.278341__full	1	0.4	0.2	0.8	0.8	1	dsDNAphage	2321	1	100	0	Likely viral
NODE_38889_length_1700_cov_5.869909__lt2gene	nan	nan	nan	nan	nan	nan	dsDNAphage	1700	1	100	0	Likely viral
NODE_10473_length_4787_cov_6.349535__full	1	0.9	0.6	0.7	1	1	lavidaviridae	4785	0	40	0	Likely viral
NODE_25169_length_2360_cov_173.125813__full	0.9	0.7	0.3	1	0.7	1	ssDNA	2359	0	100	0	Likely viral
NODE_29812_length_2071_cov_3.670139__lt2gene	nan	nan	nan	nan	nan	nan	dsDNAphage	2071	1	100	0	Likely viral
NODE_28449_length_2145_cov_7.215311__full	0.9	0.4	0.2	0.9	0.6	0.9	dsDNAphage	2143	0	100	0	Likely viral
NODE_19871_length_2859_cov_64.570970__full	0.9	0.8	0.2	0.8	0.5	0.9	dsDNAphage	2856	0	42.9	0	Likely viral
NODE_39303_length_1686_cov_100.185162__full	0.9	0.7	0.3	1	0.8	1	ssDNA	1684	0	100	0	Likely viral
NODE_39706_length_1674_cov_4.575664__full	0.7	0.5	0.2	0.7	0.2	0.7	ssDNA	1671	0	50	0	Likely viral
NODE_13424_length_3916_cov_4.130277__full	1	0.4	0.4	0.9	1	1	lavidaviridae	3915	0	27.3	0	Likely viral
NODE_17803_length_3127_cov_59.583333__full	1	0.6	0.1	0.8	0.2	1	dsDNAphage	3125	0	45.5	0	Likely viral
NODE_20762_length_2758_cov_2.823899__full	0.8	0.9	0.8	1	1	1	ssDNA	2757	0	40	0	Likely viral
NODE_45679_length_1507_cov_13.713499__lt2gene	nan	nan	nan	nan	nan	nan	dsDNAphage	1507	1	100	0	Likely viral
NODE_19863_length_2860_cov_159.006061__full	1	1	0.3	1	0.9	1	dsDNAphage	2767	1	100	0	Likely viral
NODE_25048_length_2369_cov_2.419620__full	0.9	1	0.8	1	1	1	lavidaviridae	2349	0	25	0	Likely viral
NODE_32823_length_1924_cov_267.356340__full	0.8	0.5	0.2	1	0.9	1	ssDNA	1921	0	100	0	Likely viral
NODE_32155_length_1953_cov_567.714963__full	0.6	0.2	0.4	1	0.8	1	ssDNA	1745	0	33.3	0	Likely viral
NODE_14159_length_3749_cov_12.798322__full	0.8	0.6	0.3	0.9	0.7	0.9	ssDNA	3748	0	66.7	0	Likely viral
NODE_34281_length_1863_cov_6.087389__full	0.8	1	0.2	0.9	1	1	lavidaviridae	1861	0	66.7	0	Likely viral
NODE_20698_length_2765_cov_129.104797__lt2gene	nan	nan	nan	nan	nan	nan	dsDNAphage	2765	1	100	0	Unsure
NODE_20750_length_2759_cov_26.382396__full	0.4	0.6	0.2	0.8	0.9	0.9	lavidaviridae	2265	0	25	0	Unsure
NODE_14862_length_3602_cov_3.667606__full	0.2	0.7	0	0	0.2	0.7	NCLDV	3599	0	25	0	Unsure
NODE_39364_length_1684_cov_44.839165__lt2gene	nan	nan	nan	nan	nan	nan	dsDNAphage	1684	1	100	0	Unsure

## Sheet: Contigs < 5kb - DRAM-v annotati
scaffold	gene_position	start_position	end_position	strandedness	rank	kegg_id	kegg_hit	kegg_RBH	kegg_identity	kegg_bitScore	kegg_eVal	viral_id	viral_hit	viral_RBH	viral_identity	viral_bitScore	viral_eVal	pfam_hits	cazy_hits	vogdb_description	vogdb_categories	heme_regulatory_motif_count	peptidase_id	peptidase_family	peptidase_hit	peptidase_RBH	peptidase_identity	peptidase_bitScore	peptidase_eVal	vogdb_hits	virsorter_category	auxiliary_score	is_transposon	amg_flags
NODE_10473_length_4787_cov_6.349535__full-cat_2	1	1	1899	-1	E																0										2	5	FALSE	F
NODE_10473_length_4787_cov_6.349535__full-cat_2	2	1916	3415	-1	E																0										2	4	FALSE	F
NODE_10473_length_4787_cov_6.349535__full-cat_2	3	3459	4301	-1	E																0										1	4	FALSE	F
NODE_10473_length_4787_cov_6.349535__full-cat_2	4	4298	4675	-1	E							YP_008853927.1	YP_008853927.1 hypothetical protein [Ralstonia phage RSB3]	FALSE	0.436	74	2.49e-15				0										1	4	FALSE	F
NODE_10473_length_4787_cov_6.349535__full-cat_2	5	4681	4785	-1	E																0										2	5	FALSE	F
NODE_10593_length_4749_cov_2.648274__full-cat_2	1	1	1392	1	C		gni:GNIT_3694 phage related integrase	FALSE	0.177	62	2.63e-07							Phage integrase family [PF00589.22]			0								sp|O10330|VLF1_NPVOP Very late expression factor 1; Xr	Xr	1	5	FALSE	VF
NODE_10593_length_4749_cov_2.648274__full-cat_2	2	1596	1826	-1	E																0											3	FALSE	F
NODE_10593_length_4749_cov_2.648274__full-cat_2	3	1991	3319	1	C		pub:SAR11_0642 serine protease	FALSE	0.445	204	1.13e-53	YP_008319512.1	YP_008319512.1 Morn repeat domain containing protein [Pandoravirus dulcis]	FALSE	0.374	88	3.46e-17	Trypsin-like peptidase domain [PF13365.6]			0	MER0048738	S01C	MER0048738 - subfamily S1C unassigned peptidases (Pelagibacter ubique) [S01.UPC]#S01C#{peptidase unit: 155-304}~source AAZ21462~	FALSE	0.59	158	3.25e-39	REFSEQ putative peptidase/serine protease; Xu	Xu	1	3	FALSE	PF
NODE_10593_length_4749_cov_2.648274__full-cat_2	4	3853	4746	1	C		rsn:RSPO_c01519 xerD; hypothetical protein	FALSE	0.431	249	4.62e-71	YP_009007086.1	YP_009007086.1 Site-specific DNA recombinase [Pseudomonas phage vB_PaeP_Tr60_Ab31]	FALSE	0.352	175	3.7e-47	Phage integrase family [PF00589.22]			0								sp|O10330|VLF1_NPVOP Very late expression factor 1; Xr	Xr	1	5	FALSE	VF
NODE_11992_length_4297_cov_12.143564__full-cat_1	1	1	378	-1	E																0										2	5	FALSE	F
NODE_11992_length_4297_cov_12.143564__full-cat_1	2	686	2161	1	C		dap:Dacet_2220 phage protein	FALSE	0.404	311	2.85e-89	YP_003344808.1	YP_003344808.1 putative terminase large subunit TerL [Aggregatibacter phage S1249]	FALSE	0.336	237	1.23e-65	Terminase RNaseH-like domain [PF17289.2]; Terminase-like family [PF03237.15]			0								sp|P10310|TERL_BPT3 Terminase, large subunit gp19; XhXr	Xr;Xh	0	4	FALSE	VF
NODE_11992_length_4297_cov_12.143564__full-cat_1	3	2161	3039	1	E																0										1	2	FALSE	F
NODE_11992_length_4297_cov_12.143564__full-cat_1	4	3187	4242	1	C		gdj:Gdia_2553 hypothetical protein	FALSE	0.274	107	5.15e-22										0										1	5	FALSE	F
NODE_13424_length_3916_cov_4.130277__full-cat_2	1	1	570	-1	C		bbe:BBR47_35140 N-acetylmuramoyl-L-alanine amidase (EC:3.5.1.28)	FALSE	0.278	76	2.52e-13	YP_009100934.1	YP_009100934.1 putative amidase [Idiomarinaceae phage 1N2-2]	FALSE	0.342	79	5.09e-16	N-acetylmuramoyl-L-alanine amidase [PF01510.25]			0								sp|P20331|ENLYS_BPT3 Endolysin; XhXp	Xp;Xh	1	5	FALSE	F
NODE_13424_length_3916_cov_4.130277__full-cat_2	2	570	767	-1	E																0										2	3	FALSE	F
NODE_13424_length_3916_cov_4.130277__full-cat_2	3	769	915	-1	E																0										2	3	FALSE	F
NODE_13424_length_3916_cov_4.130277__full-cat_2	4	915	1112	-1	E																0										1	3	FALSE	F
NODE_13424_length_3916_cov_4.130277__full-cat_2	5	1129	1347	-1	E																0										2	3	FALSE	F
NODE_13424_length_3916_cov_4.130277__full-cat_2	6	1377	1694	-1	E																0										2	3	FALSE	F
NODE_13424_length_3916_cov_4.130277__full-cat_2	7	1698	1946	-1	E																0										2	3	FALSE	F
NODE_13424_length_3916_cov_4.130277__full-cat_2	8	2011	2250	-1	E																0										2	3	FALSE	F
NODE_13424_length_3916_cov_4.130277__full-cat_2	9	2365	3084	-1	E																0										2	3	FALSE	F
NODE_13424_length_3916_cov_4.130277__full-cat_2	10	3096	3317	-1	E																0										2	3	FALSE	F
NODE_13424_length_3916_cov_4.130277__full-cat_2	11	3310	3915	-1	C		rlg:Rleg_7204 hypothetical protein	FALSE	0.434	72	1.03e-11	YP_007002089.1	YP_007002089.1 structural protein [Brucella phage Pr]	FALSE	0.559	72	1.34e-13				0										1	5	FALSE	F
NODE_14159_length_3749_cov_12.798322__full-cat_2	1	1	573	1	E																0										2	5	FALSE	F
NODE_14159_length_3749_cov_12.798322__full-cat_2	2	577	1350	1	C		sra:SerAS13_4083 hypothetical protein	FALSE	0.297	61	1.38e-07										0										1	4	FALSE	F
NODE_14159_length_3749_cov_12.798322__full-cat_2	3	1358	3748	1	C		smq:SinmeB_5017 hypothetical protein	FALSE	0.182	119	1.65e-24										0										1	5	FALSE	F
NODE_14842_length_3607_cov_5.516610__full-cat_1	1	1	2349	1	E							YP_005087528.1	YP_005087528.1 predicted protein [Cyanophage NATL2A-133]	FALSE	0.194	119	6.64e-26				0										1	5	FALSE	F
NODE_14842_length_3607_cov_5.516610__full-cat_1	2	2420	2653	1	E																0										2	2	FALSE	F
NODE_14842_length_3607_cov_5.516610__full-cat_1	3	2751	3569	1	C		bmj:BMULJ_01437 putative bacteriophage protein	FALSE	0.273	76	1.23e-12										0										0	5	FALSE	F
NODE_14862_length_3602_cov_3.667606__full-cat_2	1	1	273	-1	C		psz:PSTAB_3693 hypothetical protein	FALSE	0.802	152	1.93e-41							Bacterial protein of unknown function (Gcw_chp) [PF09694.10]			0										2	5	FALSE	F
NODE_14862_length_3602_cov_3.667606__full-cat_2	2	560	826	1	C		psc:A458_02810 hypothetical protein	FALSE	0.864	160	3.12e-44	YP_006987756.1	YP_006987756.1 phage/conjugal plasmid C-4 type zinc finger protein, TraR family [Cronobacter phage vB_CsaP_GAP52]	FALSE	0.572	100	8.21e-25	Prokaryotic dksA/traR C4-type zinc finger [PF01258.17]			0								sp|P41039|YBII_ECOLI Uncharacterized protein YbiI; Xu	Xu		4	FALSE	F
NODE_14862_length_3602_cov_3.667606__full-cat_2	3	924	1370	1	C		pmy:Pmen_0691 hemerythrin HHE cation binding domain-containing protein	FALSE	0.755	223	5.99e-65							Hemerythrin HHE cation binding domain [PF01814.23]			0										2	4	FALSE	F
NODE_14862_length_3602_cov_3.667606__full-cat_2	4	1367	2554	-1	A		psc:A458_02815 sensor histidine kinase	TRUE	0.614	467	7.4e-145	YP_002154763.1	YP_002154763.1 putative hybrid sensor histdine kinase [Feldmannia species virus]	FALSE	0.227	63	1.49e-09	Histidine kinase-, DNA gyrase B-, and HSP90-like ATPase [PF02518.26]; His Kinase A (phospho-acceptor) domain [PF00512.25]			0										1	4	FALSE	F
NODE_14862_length_3602_cov_3.667606__full-cat_2	5	2655	3599	-1	A		psz:PSTAB_3690 cytosine/purine, uracil, thiamine, allantoin permease	TRUE	0.8	507	6.1e-160							Permease for cytosine/purines, uracil, thiamine, allantoin [PF02133.15]			0										2	5	FALSE	F
NODE_17803_length_3127_cov_59.583333__full-cat_2	1	1	246	-1	E																0										1	5	FALSE	F
NODE_17803_length_3127_cov_59.583333__full-cat_2	2	243	665	-1	E																0										2	3	FALSE	F
NODE_17803_length_3127_cov_59.583333__full-cat_2	3	662	823	-1	E																0										2	3	FALSE	F
NODE_17803_length_3127_cov_59.583333__full-cat_2	4	789	938	-1	E																0										2	3	FALSE	F
NODE_17803_length_3127_cov_59.583333__full-cat_2	5	925	1233	-1	E																0										1	3	FALSE	F
NODE_17803_length_3127_cov_59.583333__full-cat_2	6	1237	1452	-1	E																0										2	3	FALSE	F
NODE_17803_length_3127_cov_59.583333__full-cat_2	7	1627	1869	-1	D													Helix-turn-helix domain [PF14090.6]			0										1	3	FALSE	F
NODE_17803_length_3127_cov_59.583333__full-cat_2	8	1966	2220	-1	E																0										1	3	FALSE	F
NODE_17803_length_3127_cov_59.583333__full-cat_2	9	2222	2398	-1	E																0										2	3	FALSE	F
NODE_17803_length_3127_cov_59.583333__full-cat_2	10	2399	2962	-1	D							YP_007674016.1	YP_007674016.1 hypothetical protein VPKG_00054 [Vibrio phage pYD21-A]	FALSE	0.314	78	1.22e-15	YqaJ-like viral recombinase domain [PF09588.10]			0								sp|Q8QL42|Y207_SIRV1 Uncharacterized protein 207; Xu	Xu	1	4	FALSE	F
NODE_17803_length_3127_cov_59.583333__full-cat_2	11	2943	3125	-1	E																0										2	5	FALSE	F
NODE_19132_length_2952_cov_2.426648__full-cat_1	1	1	591	1	E																0										1	5	FALSE	F
NODE_19132_length_2952_cov_2.426648__full-cat_1	2	596	1654	1	E																0										1	2	FALSE	F
NODE_19132_length_2952_cov_2.426648__full-cat_1	3	1920	2951	1	E																0										0	5	FALSE	F
NODE_19494_length_2902_cov_9.408500__full-cat_2	1	1	165	-1	E																0										2	5	FALSE	F
NODE_19494_length_2902_cov_9.408500__full-cat_2	2	229	375	-1	E																0										2	4	FALSE	F
NODE_19494_length_2902_cov_9.408500__full-cat_2	3	365	565	-1	E																0										2	4	FALSE	F
NODE_19494_length_2902_cov_9.408500__full-cat_2	4	590	2116	-1	C		sesp:BN6_35860 Tryptophan halogenase	FALSE	0.356	265	1.45e-73	YP_717708.1	YP_717708.1 putative tryptophan halogenase [Synechococcus phage syn9]	FALSE	0.419	334	9.68e-99	Tryptophan halogenase [PF04820.14]			0								sp|Q8KHZ8|REBH_LENAE Flavin-dependent tryptophan halogenase RebH; Xh	Xh	1	4	FALSE	F
NODE_19494_length_2902_cov_9.408500__full-cat_2	5	2137	2775	-1	C		ndo:DDD_3107 putative 2OG-Fe(II) oxygenase	FALSE	0.337	101	1.23e-21	YP_009174691.1	YP_009174691.1 putative 2OG-Fe(II) oxygenase [Yellowstone lake phycodnavirus 1]	FALSE	0.405	102	2.17e-23	2OG-Fe(II) oxygenase superfamily [PF13640.6]			0								sp|A4XQF5|Y803_PSEMY PKHD-type hydroxylase Pmen_0803; Xh	Xh	1	4	FALSE	MKF
NODE_19494_length_2902_cov_9.408500__full-cat_2	6	2811	2900	-1	E																0										2	5	FALSE	F
NODE_19863_length_2860_cov_159.006061__full-cat_1	1	1	369	1	C		fjo:Fjoh_2056 hypothetical protein	FALSE	0.468	70	2.16e-12	YP_003097443.1	YP_003097443.1 hypothetical cyanophage protein [Synechococcus phage S-RSM4]	FALSE	0.522	65	4.25e-12	Phage tail assembly chaperone protein [PF16778.5]			0								REFSEQ hypothetical protein; Xu	Xu	1	5	FALSE	F
NODE_19863_length_2860_cov_159.006061__full-cat_1	2	458	2767	1	C		smx:SM11_chr0879 putative phage tail protein	FALSE	0.512	72	4.38e-10	YP_009133422.1	YP_009133422.1 structural protein [Synechococcus phage ACG-2014d]	FALSE	0.342	93	3.36e-18				0								REFSEQ fiber protein; Xu	Xu	0	5	FALSE	F
NODE_19871_length_2859_cov_64.570970__full-cat_2	1	1	549	-1	E							YP_009098683.1	YP_009098683.1 hypothetical protein LDB17_024 [Lactobacillus phage Ld17]	FALSE	0.38	72	7.99e-14				0								REFSEQ hypothetical protein; Xu	Xu	1	5	FALSE	F
NODE_19871_length_2859_cov_64.570970__full-cat_2	2	558	833	-1	E																0										2	3	FALSE	F
NODE_19871_length_2859_cov_64.570970__full-cat_2	3	823	1770	-1	C		amr:AM1_2899 hypothetical protein	FALSE	0.356	165	6.54e-42	YP_002898981.1	YP_002898981.1 N4 gp42-like protein [Sulfitobacter phage EE36phi1]	FALSE	0.201	64	3.52e-10				0								REFSEQ hypothetical protein; Xu	Xu	1	3	FALSE	F
NODE_19871_length_2859_cov_64.570970__full-cat_2	4	1715	2032	-1	E																0										2	3	FALSE	F
NODE_19871_length_2859_cov_64.570970__full-cat_2	5	2089	2454	1	C		bph:Bphy_3409 endodeoxyribonuclease RusA	FALSE	0.369	90	4.02e-19	YP_008853836.1	YP_008853836.1 putative endodeoxyribonuclease [Ralstonia phage RSK1]	FALSE	0.435	104	1.11e-25	Endodeoxyribonuclease RusA [PF05866.11]			0								sp|Q9MCN8|RUSA_BPHK7 Crossover junction endodeoxyribonuclease rusA; Xr	Xr	1	4	FALSE	VF
NODE_19871_length_2859_cov_64.570970__full-cat_2	6	2451	2699	1	E																0										2	4	FALSE	F
NODE_19871_length_2859_cov_64.570970__full-cat_2	7	2797	2856	1	E																0										2	5	FALSE	F
NODE_20698_length_2765_cov_129.104797__lt2gene-cat_1	1	1	2763	1	E																0										0	5	FALSE	F
NODE_20750_length_2759_cov_26.382396__full-cat_2	1	1	609	-1	C		lan:Lacal_0201 hypothetical protein	FALSE	0.568	220	8.43e-63							CarboxypepD_reg-like domain [PF13715.6]			0										2	5	FALSE	F
NODE_20750_length_2759_cov_26.382396__full-cat_2	2	801	1148	-1	C		mrs:Murru_2187 membrane protein	FALSE	0.656	153	2.46e-41										0										2	4	FALSE	F
NODE_20750_length_2759_cov_26.382396__full-cat_2	3	1290	1874	1	C	K03088	fjo:Fjoh_1133 ECF subfamily RNA polymerase sigma-24 factor; K03088 RNA polymerase sigma-70 factor, ECF subfamily	FALSE	0.634	233	2.49e-67							Sigma-70 region 2 [PF04542.14]; Sigma-70, region 4 [PF08281.12]; ECF sigma factor [PF07638.11]			0								sp|P33658|RPSG_CLOAB RNA polymerase sigma-G factor; Xh	Xh	1	4	FALSE	F
NODE_20750_length_2759_cov_26.382396__full-cat_2	4	1861	2265	1	C		fjo:Fjoh_1132 hypothetical protein	FALSE	0.335	73	3.74e-13										0										2	5	FALSE	F
NODE_20762_length_2758_cov_2.823899__full-cat_2	1	1	186	1	E																0										2	5	FALSE	F
NODE_20762_length_2758_cov_2.823899__full-cat_2	2	362	625	1	E																0										1	4	FALSE	F
NODE_20762_length_2758_cov_2.823899__full-cat_2	3	663	1352	1	E																0										1	4	FALSE	F
NODE_20762_length_2758_cov_2.823899__full-cat_2	4	1575	2573	1	E																0										2	4	FALSE	F
NODE_20762_length_2758_cov_2.823899__full-cat_2	5	2575	2757	1	E																0										2	5	FALSE	F
NODE_20782_length_2756_cov_3.161792__full-cat_2	1	1	141	1	E																0										1	5	FALSE	F
NODE_20782_length_2756_cov_3.161792__full-cat_2	2	142	552	1	C		smq:SinmeB_5013 hypothetical protein	FALSE	0.408	89	1.01e-18	YP_009323142.1	YP_009323142.1 GIY-YIG_SF superfamily protein [Synechococcus phage S-CAM7]	FALSE	0.492	124	2.96e-32				0								sp|P07072|TEV2_BPT4 Intron-associated endonuclease 2; Xh	Xh	1	3	FALSE	F
NODE_20782_length_2756_cov_3.161792__full-cat_2	3	601	1419	1	C		psf:PSE_2548 phytanoyl-CoA dioxygenase	FALSE	0.402	91	2.43e-17										0										2	3	FALSE	F
NODE_20782_length_2756_cov_3.161792__full-cat_2	4	1424	1846	1	C		pmc:P9515_12991 hypothetical protein	FALSE	0.469	119	6.44e-29										0										1	3	FALSE	F
NODE_20782_length_2756_cov_3.161792__full-cat_2	5	1846	2592	1	E																0										1	4	FALSE	F
NODE_20782_length_2756_cov_3.161792__full-cat_2	6	2558	2755	1	D													Formyl transferase [PF00551.19]			0										2	5	FALSE	MKF
NODE_22102_length_2622_cov_7.276977__full-cat_2	1	1	327	-1	E																0										1	5	FALSE	F
NODE_22102_length_2622_cov_7.276977__full-cat_2	2	327	2030	-1	E							YP_009593504.1	YP_009593504.1 lysozyme-like protein [Paracoccus phage Shpa]	FALSE	0.283	60	3.58e-08				0								sp|P20331|ENLYS_BPT3 Endolysin; XhXp	Xp;Xh	1	4	FALSE	F
NODE_22102_length_2622_cov_7.276977__full-cat_2	3	2037	2621	-1	D													Phage tail lysozyme [PF18013.1]			0										2	5	FALSE	F
NODE_22566_length_2577_cov_2.390167__full-cat_2	1	1	780	1	A	K03496	swi:Swit_2848 chromosome segregation ATPase; K03496 chromosome partitioning protein	TRUE	0.677	351	5.5e-107	NP_665964.1	NP_665964.1 putative plasmid partitioning protein Soj [Natrialba phage PhiCh1]	FALSE	0.297	114	6.08e-27	AAA domain [PF13614.6]; Cellulose biosynthesis protein BcsQ [PF06564.12]; ATPase MipZ [PF09140.11]; VirC1 protein [PF07015.11]; NUBPL iron-transfer P-loop NTPase [PF10609.9]; CobQ/CobB/MinD/ParA nucleotide binding domain [PF01656.23]; Anion-transporting ATPase [PF02374.15]			0								sp|P07620|PARA_ECOLX Plasmid partition protein A; Xh	Xh		5	FALSE	F
NODE_22566_length_2577_cov_2.390167__full-cat_2	2	777	1643	1	C	K03497	eli:ELI_13070 chromosome partitioning protein; K03497 chromosome partitioning protein, ParB family	FALSE	0.639	293	2.35e-86	YP_009275618.1	YP_009275618.1 DNA binding domain protein [Gordonia phage Bowser]	FALSE	0.298	69	7.83e-12	ParB-like nuclease domain [PF02195.18]; HTH domain found in ParB protein [PF17762.1]			0								REFSEQ hypothetical protein; Xu	Xu		3	FALSE	F
NODE_22566_length_2577_cov_2.390167__full-cat_2	3	1791	2291	-1	E																0											4	FALSE	F
NODE_23097_length_2529_cov_62.329426__full-cat_1	1	1	1350	1	C		das:Daes_0338 SPla/RYanodine receptor SPRY domain-containing protein	FALSE	0.289	186	1.76e-47	YP_007517798.1	YP_007517798.1 hypothetical protein [Pelagibacter phage HTVC011P]	FALSE	0.345	250	1.32e-70	Concanavalin A-like lectin/glucanases superfamily [PF13385.6]			0								REFSEQ hypothetical protein; Xu	Xu	0	5	FALSE	MKF
NODE_23097_length_2529_cov_62.329426__full-cat_1	2	1350	2405	1	C		mag:amb4276 hypothetical protein	FALSE	0.33	183	9.66e-48	YP_007517799.1	YP_007517799.1 hypothetical protein [Pelagibacter phage HTVC011P]	FALSE	0.444	280	1.18e-82				0										0	4	FALSE	F
NODE_23097_length_2529_cov_62.329426__full-cat_1	3	2408	2491	1	E																0											4	FALSE	F
NODE_23913_length_2459_cov_4.738769__full-cat_2	1	1	435	1	E																0										2	5	FALSE	F
NODE_23913_length_2459_cov_4.738769__full-cat_2	2	442	1290	1	E																0										1	4	FALSE	F
NODE_23913_length_2459_cov_4.738769__full-cat_2	3	1376	2458	1	E																0										1	5	FALSE	F
NODE_24283_length_2428_cov_2.100716__full-cat_2	1	1	501	1	E																0										1	5	FALSE	F
NODE_24283_length_2428_cov_2.100716__full-cat_2	2	517	1608	1	E																0										2	4	FALSE	F
NODE_24283_length_2428_cov_2.100716__full-cat_2	3	1633	2427	1	E																0										2	5	FALSE	F
NODE_25048_length_2369_cov_2.419620__full-cat_2	1	1	162	1	E																0										2	5	FALSE	F
NODE_25048_length_2369_cov_2.419620__full-cat_2	2	172	696	1	E																0										2	4	FALSE	F
NODE_25048_length_2369_cov_2.419620__full-cat_2	3	732	1856	1	E																0										1	4	FALSE	F
NODE_25048_length_2369_cov_2.419620__full-cat_2	4	1858	2349	1	E																0										2	5	FALSE	F
NODE_25169_length_2360_cov_173.125813__full-cat_2	1	1	828	-1	E																0										1	5	FALSE	F
NODE_25169_length_2360_cov_173.125813__full-cat_2	2	828	1571	-1	E																0										1	3	FALSE	F
NODE_25169_length_2360_cov_173.125813__full-cat_2	3	1571	2359	-1	E																0										1	5	FALSE	F
NODE_25294_length_2352_cov_2.222029__full-cat_2	1	1	933	1	C		mpp:MICPUCDRAFT_70789 aminotransferase/S-adenosyl-L-homocysteine hydrolase (EC:2.6.1.50)	FALSE	0.505	289	1.35e-84	YP_004322338.1	YP_004322338.1 nucleotide-sugar epimerase [Synechococcus phage S-SM2]	TRUE	0.646	405	1.71e-126	GDP-mannose 4,6 dehydratase [PF16363.5]; NAD dependent epimerase/dehydratase family [PF01370.21]; RmlD substrate binding domain [PF04321.17]; 3-beta hydroxysteroid dehydrogenase/isomerase family [PF01073.19]; Male sterility protein [PF07993.12]; Polysaccharide biosynthesis protein [PF02719.15]			0								sp|Q9EQC1|3BHS7_MOUSE 3 beta-hydroxysteroid dehydrogenase type 7; Xh	Xh	1	5	FALSE	MKF
NODE_25294_length_2352_cov_2.222029__full-cat_2	2	935	1327	1	E																0										2	4	FALSE	F
NODE_25294_length_2352_cov_2.222029__full-cat_2	3	1555	2349	1	E																0										2	5	FALSE	F
NODE_25549_length_2334_cov_11.204476__full-cat_2	1	1	222	-1	E																0										2	5	FALSE	F
NODE_25549_length_2334_cov_11.204476__full-cat_2	2	230	538	-1	E																0										2	4	FALSE	F
NODE_25549_length_2334_cov_11.204476__full-cat_2	3	640	948	-1	E																0										1	4	FALSE	F
NODE_25549_length_2334_cov_11.204476__full-cat_2	4	972	2282	-1	E																0										1	5	FALSE	F
NODE_25722_length_2322_cov_14.278341__full-cat_1	1	1	1473	-1	C		rce:RC1_0089 phage tail protein	FALSE	0.346	257	7.48e-71	YP_009196812.1	YP_009196812.1 tail fiber protein [Escherichia phage CAjan]	FALSE	0.307	199	3.71e-53				0								REFSEQ putative tail fibre protein; Xu	Xu	0	5	FALSE	F
NODE_25722_length_2322_cov_14.278341__full-cat_1	2	1466	1888	-1	D													RTX toxin acyltransferase family [PF02794.16]			0										1	2	FALSE	F
NODE_25722_length_2322_cov_14.278341__full-cat_1	3	1896	2321	-1	C		rce:RC1_0087 hypothetical protein	FALSE	0.341	76	7.32e-14										0								REFSEQ hypothetical protein; Xu	Xu	1	5	FALSE	F
NODE_26416_length_2272_cov_11.224177__lt2gene-cat_1	1	2	2272	-1	E																0								sp|Q5UQ13|COLL2_MIMIV Collagen-like protein 2; XhXs	Xs;Xh	0	5	FALSE	VF
NODE_26521_length_2264_cov_29.884563__full-cat_2	1	1	300	-1	C	K09014	hne:HNE_2619 sufB; cysteine desulfurase activator complex subunit SufB; K09014 Fe-S cluster assembly protein SufB	FALSE	0.881	154	4.47e-42										0										2	5	FALSE	F
NODE_26521_length_2264_cov_29.884563__full-cat_2	2	300	1445	-1	A	K04487	hne:HNE_2620 class-V pyridoxal-phosphate-dependent aminotransferase; K04487 cysteine desulfurase [EC:2.8.1.7]	TRUE	0.689	525	6.31e-165	YP_009361727.1	YP_009361727.1 Cysteine desulfurase NifS [Pacmanvirus A23]	FALSE	0.222	109	2.58e-24	Aminotransferase class-V [PF00266.19]; Pyridoxal-dependent decarboxylase conserved domain [PF00282.19]			0								sp|A5I4Z9|ISCS_CLOBH Cysteine desulfurase IscS; Xh	Xh	1	4	FALSE	MKF
NODE_26521_length_2264_cov_29.884563__full-cat_2	3	1555	2124	1	A		hne:HNE_2621 hypothetical protein	TRUE	0.922	369	1.11e-114							X-Pro dipeptidyl-peptidase (S15 family) [PF02129.18]; Serine aminopeptidase, S33 [PF12146.8]; Alpha/beta hydrolase family [PF12697.7]; Prolyl oligopeptidase family [PF00326.21]; alpha/beta hydrolase fold [PF00561.20]			0	MER0096024	S09C	MER0096024 - subfamily S9C unassigned peptidases (Hyphomonas neptunium) [S09.UPC]#S09C#{peptidase unit: 1-211}~source YP_761310~	TRUE	0.922	369	7.8e-116			2	5	FALSE	PF
NODE_26759_length_2250_cov_8.978588__full-cat_2	1	1	1794	-1	A		psm:PSM_A3099 transcriptional regulator, MerR family protein	TRUE	0.82	1008	0	YP_004323065.1	YP_004323065.1 alkaline phosphatase [Synechococcus phage S-SM1]	FALSE	0.195	70	2.82e-11				0										1	5	FALSE	F
NODE_26759_length_2250_cov_8.978588__full-cat_2	2	1878	1991	-1	E																0											4	FALSE	F
NODE_26949_length_2237_cov_24.763978__full-cat_2	1	1	234	1	C		cak:Caul_2230 integrase family protein	FALSE	0.928	148	2.41e-40							Phage integrase family [PF00589.22]			0										2	5	FALSE	TF
NODE_26949_length_2237_cov_24.763978__full-cat_2	2	231	1163	1	A		acr:Acry_3506 phage integrase family protein	TRUE	0.757	475	3.26e-149							Phage integrase family [PF00589.22]			0								sp|O10330|VLF1_NPVOP Very late expression factor 1; Xr	Xr	1	4	FALSE	VTF
NODE_26949_length_2237_cov_24.763978__full-cat_2	3	1160	2152	1	A		cak:Caul_2228 integrase family protein	TRUE	0.865	593	1.01e-189	YP_009595182.1	YP_009595182.1 tyrosine recombinase XerD-like protein [Bacillus phage Mgbh1]	FALSE	0.254	97	1.1e-20	Phage integrase family [PF00589.22]; Phage integrase, N-terminal SAM-like domain [PF02899.17]; Phage integrase, N-terminal SAM-like domain [PF13495.6]; Phage integrase SAM-like domain [PF13102.6]			0								sp|O10330|VLF1_NPVOP Very late expression factor 1; Xr	Xr	1	4	TRUE	VTF
NODE_26949_length_2237_cov_24.763978__full-cat_2	4	2155	2235	1	E																0										2	5	FALSE	TF
NODE_27061_length_2229_cov_4.014719__lt2gene-cat_1	1	3	1790	-1	D							YP_006560346.1	YP_006560346.1 phage portal protein [Nonlabens phage P12024S]	FALSE	0.271	225	1.58e-60	Phage portal protein [PF04860.12]			0								sp|Q4Z9G3|PORTL_BPTWO Probable portal protein; XpXrXs	Xp;Xs;Xr	0	5	FALSE	VF
NODE_27061_length_2229_cov_4.014719__lt2gene-cat_1	2	1801	2229	-1	E																0										1	5	FALSE	F
NODE_27367_length_2209_cov_2.325905__full-cat_2	1	1	90	-1	E																0										2	5	FALSE	F
NODE_27367_length_2209_cov_2.325905__full-cat_2	2	90	1559	-1	A		swi:Swit_1578 DNA methylase N-4/N-6 domain-containing protein	TRUE	0.458	367	1.19e-108	YP_007673350.1	YP_007673350.1 DNA methylase [Psychrobacter phage pOW20-A]	FALSE	0.283	176	2.11e-45	DNA methylase [PF01555.18]; ParB-like nuclease domain [PF02195.18]			0								sp|P29538|MTH1_HAEPA Modification methylase HpaI; XhXp	Xp;Xh	1	5	FALSE	F
NODE_27514_length_2200_cov_7.323077__lt2gene-cat_1	1	2	1357	1	C		nmc:NMC0857 phage related protein	FALSE	0.374	288	4.93e-82	YP_001039817.1	YP_001039817.1 putative phage-related protein [Vibrio virus VP882]	FALSE	0.35	255	1.84e-72	Phage portal protein, lambda family [PF05136.13]			0								sp|P36272|PORTL_BPP21 Portal protein B; XpXrXs	Xp;Xs;Xr	0	5	FALSE	VF
NODE_27514_length_2200_cov_7.323077__lt2gene-cat_1	2	1347	2198	1	C		nmc:NMC0858 phage-like protein	FALSE	0.326	142	1.53e-34	YP_009616297.1	YP_009616297.1 major capsid protein [Rhodobacter phage RcCronus]	FALSE	0.327	137	1.51e-34	Caudovirus prohead serine protease [PF04586.17]			0	MER0194231	S78	MER0194231 - family S78 non-peptidase homologues (Neisseria meningitidis) [S78.UNW]#S78#{peptidase unit: 24-163}~source CBA05300~	FALSE	0.437	106	2.12e-23			0	5	FALSE	PF
NODE_27571_length_2196_cov_5.817375__full-cat_2	1	1	375	-1	E																0										2	5	FALSE	F
NODE_27571_length_2196_cov_5.817375__full-cat_2	2	522	1484	-1	C		mdi:METDI2560 site-specific DNA methyltransferase	FALSE	0.348	209	4.22e-57	YP_009210412.1	YP_009210412.1 DNA methylase [Mycobacterium phage Nerujay]	FALSE	0.364	213	8.36e-60	DNA methylase [PF01555.18]			0								sp|P29538|MTH1_HAEPA Modification methylase HpaI; XhXp	Xp;Xh	1	4	FALSE	F
NODE_27571_length_2196_cov_5.817375__full-cat_2	3	1453	2118	-1	E																0										2	5	FALSE	F
NODE_28449_length_2145_cov_7.215311__full-cat_2	1	1	117	1	E																0								REFSEQ hypothetical protein; Xu	Xu	1	5	FALSE	F
NODE_28449_length_2145_cov_7.215311__full-cat_2	2	107	331	1	E							YP_009201269.1	YP_009201269.1 hypothetical protein [Vibrio phage ValKK3]	FALSE	0.637	82	6.68e-19				0								REFSEQ hypothetical protein; Xu	Xu	1	3	FALSE	F
NODE_28449_length_2145_cov_7.215311__full-cat_2	3	341	2143	1	E																0										1	5	FALSE	F
NODE_29690_length_2078_cov_10.799802__full-cat_2	1	1	558	1	E																0										1	5	FALSE	F
NODE_29690_length_2078_cov_10.799802__full-cat_2	2	558	1016	1	E																0										1	3	FALSE	F
NODE_29690_length_2078_cov_10.799802__full-cat_2	3	1049	2074	1	E																0										1	5	FALSE	F
NODE_29812_length_2071_cov_3.670139__lt2gene-cat_1	1	1	2070	-1	E							YP_008241478.1	YP_008241478.1 structural protein [Cellulophaga phage phi38:1]	FALSE	0.317	131	8.06e-30				0										0	5	FALSE	F
NODE_31137_length_2003_cov_62.968686__full-cat_1	1	1	666	1	E							YP_007517798.1	YP_007517798.1 hypothetical protein [Pelagibacter phage HTVC011P]	FALSE	0.304	104	4.46e-24				0										0	5	FALSE	F
NODE_31137_length_2003_cov_62.968686__full-cat_1	2	666	1715	1	C		mag:amb4276 hypothetical protein	FALSE	0.354	198	9.46e-53	YP_007517799.1	YP_007517799.1 hypothetical protein [Pelagibacter phage HTVC011P]	FALSE	0.458	292	1.24e-86				0										0	2	FALSE	F
NODE_31137_length_2003_cov_62.968686__full-cat_1	3	1718	2002	1	E																0										1	5	FALSE	F
NODE_32155_length_1953_cov_567.714963__full-cat_2	1	3	113	-1	E																0											5	FALSE	F
NODE_32155_length_1953_cov_567.714963__full-cat_2	2	268	1275	-1	C		yep:YE105_C2158 Phage/plasmid replication protein, gene II/X family	FALSE	0.383	220	1.16e-60	NP_039615.1	NP_039615.1 gene II product [Escherichia virus I22]	FALSE	0.392	222	1.09e-62	Phage replication protein CRI [PF05144.14]; Phage X family [PF05155.15]			0										1	4	FALSE	F
NODE_32155_length_1953_cov_567.714963__full-cat_2	3	1268	1555	-1	E																0										2	4	FALSE	F
NODE_32155_length_1953_cov_567.714963__full-cat_2	4	1548	1745	-1	E																0										2	5	FALSE	F
NODE_32823_length_1924_cov_267.356340__full-cat_2	1	1	333	-1	E							YP_007517736.1	YP_007517736.1 hypothetical protein [Pelagibacter phage HTVC010P]	FALSE	0.598	115	7.16e-30				0										1	5	FALSE	F
NODE_32823_length_1924_cov_267.356340__full-cat_2	2	335	544	-1	E																0										1	3	FALSE	F
NODE_32823_length_1924_cov_267.356340__full-cat_2	3	569	1921	-1	C		gdj:Gdia_2465 hypothetical protein	FALSE	0.305	105	8.9e-21										0										1	5	FALSE	F
NODE_34140_length_1870_cov_2.565289__full-cat_2	1	1	300	-1	E																0										2	5	FALSE	F
NODE_34140_length_1870_cov_2.565289__full-cat_2	2	356	583	-1	E																0										2	4	FALSE	F
NODE_34140_length_1870_cov_2.565289__full-cat_2	3	716	970	-1	E																0										2	4	FALSE	F
NODE_34140_length_1870_cov_2.565289__full-cat_2	4	978	1250	-1	E																0								sp|P14107|Y8K6_BPP22 Uncharacterized 8.6 kDa protein in ral-gp17 intergenic region; Xu	Xu	1	4	FALSE	F
NODE_34140_length_1870_cov_2.565289__full-cat_2	5	1255	1464	-1	E																0										2	4	FALSE	F
NODE_34140_length_1870_cov_2.565289__full-cat_2	6	1486	1662	-1	E																0										2	4	FALSE	F
NODE_34140_length_1870_cov_2.565289__full-cat_2	7	1637	1798	-1	E																0										2	5	FALSE	F
NODE_34281_length_1863_cov_6.087389__full-cat_2	1	1	135	1	E																0										2	5	FALSE	F
NODE_34281_length_1863_cov_6.087389__full-cat_2	2	147	1058	1	E																0										1	4	FALSE	F
NODE_34281_length_1863_cov_6.087389__full-cat_2	3	1064	1861	-1	E							YP_007517993.1	YP_007517993.1 hypothetical protein [Pelagibacter phage HTVC008M]	FALSE	0.434	205	3.01e-58				0								REFSEQ hypothetical protein; Xu	Xu	1	5	FALSE	F
NODE_35112_length_1831_cov_442.146959__full-cat_2	1	1	372	-1	E																0										2	5	FALSE	F
NODE_35112_length_1831_cov_442.146959__full-cat_2	2	359	880	-1	C	K03796	din:Selin_0575 lysozyme subfamily 2; K03796 Bax protein	FALSE	0.429	74	1.01e-12	YP_007518053.1	YP_007518053.1 putative lysozyme [Pelagibacter phage HTVC008M]	FALSE	0.381	100	2.77e-23	Mannosyl-glycoprotein endo-beta-N-acetylglucosaminidase [PF01832.20]	GH73 lysozyme (EC 3.2.1.17); mannosyl-glycoprotein endo-beta-N-acetylglucosaminidase (EC 3.2.1.96); peptidoglycan hydrolase with endo-beta-N-acetylglucosaminidase specificity (EC 3.2.1.-) [GH73]		0										1	4	FALSE	MKAF
NODE_35112_length_1831_cov_442.146959__full-cat_2	3	880	1830	-1	C	K02335	tid:Thein_1717 DNA polymerase I; K02335 DNA polymerase I [EC:2.7.7.7]	FALSE	0.34	173	7.35e-45	YP_009600220.1	YP_009600220.1 putative DNA polymerase A [Dinoroseobacter phage vB_DshS-R5C]	FALSE	0.418	243	3.48e-70	DNA polymerase family A [PF00476.20]			0										1	5	FALSE	F
NODE_35164_length_1830_cov_3.848451__lt2gene-cat_1	1	1	1434	1	D							YP_009611805.1	YP_009611805.1 hypothetical protein [Agrobacterium phage Atu_ph07]	FALSE	0.329	241	3.78e-67	T4-like virus Myoviridae tail sheath stabiliser [PF16724.5]			0								sp|P11112|COMPL_BPT4 Tail completion protein gp15; XhXs	Xs;Xh	0	5	FALSE	VF
NODE_35164_length_1830_cov_3.848451__lt2gene-cat_1	2	1465	1830	1	C		put:PT7_0648 NUDIX hydrolase	FALSE	0.339	60	1.02e-08	YP_009599727.1	YP_009599727.1 MutT/NUDIX hydrolase family protein [Serratia phage BF]	FALSE	0.469	102	5.4e-25	NUDIX domain [PF00293.28]			0								sp|P32271|Y06L_BPT4 Uncharacterized 17.7 kDa protein in e-segB intergenic region; Xu	Xu	1	5	FALSE	F
NODE_35341_length_1823_cov_3.949661__lt2gene-cat_1	1	2	1453	1	E																0										0	5	FALSE	F
NODE_35341_length_1823_cov_3.949661__lt2gene-cat_1	2	1469	1822	1	C	K03791	nit:NAL212_2687 glycoside hydrolase family protein; K03791 putative chitinase	FALSE	0.725	128	1.2e-32	YP_009277044.1	YP_009277044.1 putative chitinase [Ralstonia phage RSP15]	FALSE	0.706	124	6.82e-33	Chitinase class I [PF00182.19]			0										0	5	FALSE	F
NODE_35848_length_1804_cov_7.648370__lt2gene-cat_1	1	3	296	1	E							YP_008241471.1	YP_008241471.1 hypothetical protein Phi38:1_gp090 [Cellulophaga phage phi38:1]	FALSE	0.368	68	1.26e-13				0										1	5	FALSE	F
NODE_35848_length_1804_cov_7.648370__lt2gene-cat_1	2	300	1802	1	E							YP_008241472.1	YP_008241472.1 structural protein [Cellulophaga phage phi38:1]	FALSE	0.367	308	5.98e-90				0								REFSEQ structural protein; Xu	Xu	0	5	FALSE	F
NODE_36452_length_1782_cov_17.044007__full-cat_2	1	1	369	1	E																0										1	5	FALSE	F
NODE_36452_length_1782_cov_17.044007__full-cat_2	2	379	747	1	E																0										1	3	FALSE	F
NODE_36452_length_1782_cov_17.044007__full-cat_2	3	751	1779	1	E																0										1	5	FALSE	F
NODE_36882_length_1767_cov_96.320093__full-cat_1	1	1	672	1	C		mag:amb4276 hypothetical protein	FALSE	0.234	66	8.86e-10	YP_007517798.1	YP_007517798.1 hypothetical protein [Pelagibacter phage HTVC011P]	FALSE	0.229	62	7.88e-10				0										0	5	FALSE	F
NODE_36882_length_1767_cov_96.320093__full-cat_1	2	674	1744	1	C		mag:amb4276 hypothetical protein	FALSE	0.39	235	1.74e-65	YP_007517799.1	YP_007517799.1 hypothetical protein [Pelagibacter phage HTVC011P]	FALSE	0.459	295	9.74e-88				0										0	5	FALSE	F
NODE_38258_length_1720_cov_19.139339__full-cat_2	1	1	132	1	E																0										2	5	FALSE	F
NODE_38258_length_1720_cov_19.139339__full-cat_2	2	180	1712	1	E																0								REFSEQ hypothetical protein; Xu	Xu	1	5	FALSE	F
NODE_38819_length_1702_cov_16.859745__full-cat_2	1	1	234	1	E																0										2	5	FALSE	F
NODE_38819_length_1702_cov_16.859745__full-cat_2	2	237	362	1	E																0										1	4	FALSE	F
NODE_38819_length_1702_cov_16.859745__full-cat_2	3	362	478	1	E																0										1	3	FALSE	F
NODE_38819_length_1702_cov_16.859745__full-cat_2	4	481	633	1	E																0										2	3	FALSE	F
NODE_38819_length_1702_cov_16.859745__full-cat_2	5	633	1292	1	E																0										2	3	FALSE	F
NODE_38819_length_1702_cov_16.859745__full-cat_2	6	1294	1590	1	E							YP_007517741.1	YP_007517741.1 hypothetical protein [Pelagibacter phage HTVC010P]	FALSE	0.498	81	2.77e-18				0										1	4	FALSE	F
NODE_38819_length_1702_cov_16.859745__full-cat_2	7	1635	1700	1	E																0										2	5	FALSE	F
NODE_38889_length_1700_cov_5.869909__lt2gene-cat_1	1	3	1700	1	C		cat:CA2559_06760 outer membrane protein	FALSE	0.321	243	2.06e-65	YP_009361366.1	YP_009361366.1 Hypothetical protein PACV_15 [Pacmanvirus A23]	FALSE	0.219	65	7.25e-10				0								REFSEQ hypothetical protein; Xu	Xu	0	5	FALSE	F
NODE_39209_length_1690_cov_5.335168__lt2gene-cat_1	1	2	184	-1	E																0										0	5	FALSE	F
NODE_39209_length_1690_cov_5.335168__lt2gene-cat_1	2	208	1689	-1	C		bba:Bd1130 yapH; YapH protein	FALSE	0.217	73	1.17e-10	YP_009173079.1	YP_009173079.1 hypothetical protein OlV7_067 [Ostreococcus lucimarinus virus 7]	FALSE	0.205	71	8.6e-12				0										0	5	FALSE	F
NODE_39303_length_1686_cov_100.185162__full-cat_2	1	1	1146	-1	C		ocg:OCA5_c22810 cya; adenylate/guanylate cyclase Cya (EC:4.6.1.1)	FALSE	0.299	189	3.18e-49	YP_007517885.1	YP_007517885.1 adenylate/guanylyl cyclase [Pelagibacter phage HTVC008M]	FALSE	0.374	232	1.2e-65	CHASE2 domain [PF05226.11]			0										1	5	FALSE	F
NODE_39303_length_1686_cov_100.185162__full-cat_2	2	1143	1412	-1	E																0										1	3	FALSE	F
NODE_39303_length_1686_cov_100.185162__full-cat_2	3	1406	1684	-1	E							YP_004421500.1	YP_004421500.1 unnamed protein product [Synechococcus phage S-CBS2]	FALSE	0.683	128	1.24e-34				0								REFSEQ hypothetical protein; Xu	Xu	1	5	FALSE	F
NODE_39364_length_1684_cov_44.839165__lt2gene-cat_1	1	2	1684	1	E																0										0	5	FALSE	F
NODE_39706_length_1674_cov_4.575664__full-cat_2	1	1	333	1	C	K13993	mpz:Marpi_1446 molecular chaperone; K13993 HSP20 family protein	FALSE	0.456	87	2.31e-18							Hsp20/alpha crystallin family [PF00011.21]; HSP20-like domain found in ArsA [PF17886.1]			0								sp|P70918|HSPB_BRADU Small heat shock protein HspB; Xh	Xh	1	5	FALSE	F
NODE_39706_length_1674_cov_4.575664__full-cat_2	2	361	534	1	E																0										2	3	FALSE	F
NODE_39706_length_1674_cov_4.575664__full-cat_2	3	598	777	1	E																0										2	3	FALSE	F
NODE_39706_length_1674_cov_4.575664__full-cat_2	4	793	1671	1	E																0										1	5	FALSE	F
NODE_40427_length_1652_cov_2.685034__full-cat_2	1	1	732	-1	A	K10804	cao:Celal_3892 lipolytic protein g-d-s-l family; K10804 acyl-CoA thioesterase I [EC:3.1.2.- 3.1.1.5]	TRUE	0.743	349	6.91e-107							GDSL-like Lipase/Acylhydrolase family [PF13472.6]; GDSL-like Lipase/Acylhydrolase family [PF14606.6]; GDSL-like Lipase/Acylhydrolase [PF00657.22]; Protein of unknown function (DUF459) [PF04311.13]	CE3 acetyl xylan esterase (EC 3.1.1.72). [CE3]		0								REFSEQ hypothetical protein; Xu	Xu	2	5	FALSE	MFB
NODE_40427_length_1652_cov_2.685034__full-cat_2	2	756	1445	1	A	K02003	cao:Celal_3891 phosphonate-transporting ATPase (EC:3.6.3.28); K02003 putative ABC transport system ATP-binding protein	TRUE	0.825	391	1.54e-121	YP_004957306.1	YP_004957306.1 unnamed protein product [Planktothrix phage PaV-LD]	FALSE	0.416	166	3.08e-45	ABC transporter [PF00005.27]; RecF/RecN/SMC N terminal domain [PF02463.19]			0										1	4	FALSE	MFB
NODE_40427_length_1652_cov_2.685034__full-cat_2	3	1493	1648	1	C	K02004	cao:Celal_3890 hypothetical protein; K02004 putative ABC transport system permease protein	FALSE	0.873	97	5.05e-23										0										2	5	FALSE	MFB
NODE_41657_length_1615_cov_2.005128__full-cat_2	1	1	243	1	E																0										1	5	FALSE	F
NODE_41657_length_1615_cov_2.005128__full-cat_2	2	293	670	1	E																0										1	3	FALSE	F
NODE_41657_length_1615_cov_2.005128__full-cat_2	3	660	1391	1	E																0										1	3	FALSE	F
NODE_41657_length_1615_cov_2.005128__full-cat_2	4	1369	1614	1	E																0										1	5	FALSE	F
NODE_43104_length_1573_cov_8.111989__full-cat_2	1	1	273	-1	C		lfi:LFML04_0712 DNA or RNA helicase of superfamily II	FALSE	0.577	104	1.15e-24	YP_007673683.1	YP_007673683.1 helicase, partial [Salicola phage CGphi29]	FALSE	0.791	148	1.1e-41	Type III restriction enzyme, res subunit [PF04851.15]			0										1	5	FALSE	F
NODE_43104_length_1573_cov_8.111989__full-cat_2	2	270	1277	-1	C		mgm:Mmc1_2918 hypothetical protein	FALSE	0.402	217	1.92e-59	YP_007673684.1	YP_007673684.1 hypothetical protein SLPG_00002 [Salicola phage CGphi29]	TRUE	0.621	385	6.41e-119				0								sp|Q8QL42|Y207_SIRV1 Uncharacterized protein 207; Xu	Xu	1	3	FALSE	F
NODE_43104_length_1573_cov_8.111989__full-cat_2	3	1336	1569	-1	E																0										1	5	FALSE	F
NODE_44017_length_1549_cov_13.160643__lt2gene-cat_1	1	2	1549	-1	C	K06907	dbr:Deba_1801 tail sheath protein; K06907	FALSE	0.243	104	2.06e-20	YP_009302431.1	YP_009302431.1 tail sheath protein [Bacillus phage SP-15]	FALSE	0.414	129	6.74e-30	Phage tail sheath protein subtilisin-like domain [PF04984.14]			0								sp|P13332|TSP_BPT4 Tail sheath protein; XpXrXs	Xp;Xs;Xr	0	5	FALSE	VF
NODE_45679_length_1507_cov_13.713499__lt2gene-cat_1	1	2	1507	1	D							YP_009011619.1	YP_009011619.1 gp5 baseplate hub subunit and tail lysozyme [Aeromonas phage PX29]	FALSE	0.242	158	3.48e-39	Gp5 N-terminal OB domain [PF06714.11]			0								sp|P16009|BP5_BPT4 Baseplate central spike complex protein gp5; XhXpXrXs	Xp;Xs;Xr;Xh	0	5	FALSE	VF
